# Supplementary material for: Decomposition analysis on the excitation behaviors of thiazolothiazole (TTz)-based dyes via the time-dependent dielectric density functional theory approach
Source: Royal Society of Chemistry journal article supplement (doi:10.1039/d2ra06454e), 2022-01-01
Supplement: d2ra06454e1.pdf [file d2ra06454e1.pdf]

## Supporting Information

### **Decomposition analysis on the excitation behaviors of thiazolothiazole (TTz)-based dyes via the time-dependent dielectric density functional theory approach**

Takumi Naitou, Yukiumi Kita, Tomomi Shimazaki and Masanori Tachikawa

Graduate School of Nanobioscience, Yokohama City University,  
22-2 Seto, Kanazawa-ku, Yokohama 236-0026, Japan

**Table S1. Absorption spectra changes according to basis sets. Here, the results of Eq. (2) are obtained by using the same dielectric constants described in the manuscript.**

|                                          | <b>3-21G</b> | <b>6-31G</b> | <b>6-31G*</b> |
|------------------------------------------|--------------|--------------|---------------|
| <b>B3LYP</b>                             |              |              |               |
| Bu <sub>2</sub> N-TTz-Py in toluene      | 2.62         | 2.56         | 2.67          |
| Bu <sub>2</sub> N-TTz-Py in chloroform   | 2.58         | 2.53         | 2.64          |
| Bu <sub>2</sub> N-TTz-Py in DCM          | 2.57         | 2.51         | 2.62          |
| Bu <sub>2</sub> N-TTz-Py in methanol     | 2.56         | 2.50         | 2.62          |
| Ph <sub>2</sub> N-TTz-Py in toluene      | 2.52         | 2.43         | 2.55          |
| Ph <sub>2</sub> N-TTz-Py in chloroform   | 2.50         | 2.41         | 2.53          |
| Ph <sub>2</sub> N-TTz-Py in DCM          | 2.49         | 2.40         | 2.52          |
| Ph <sub>2</sub> N-TTz-Py in methanol     | 2.50         | 2.40         | 2.53          |
| Ph <sub>2</sub> N-TTz-CHO in toluene     | 2.36         | 2.25         | 2.36          |
| Ph <sub>2</sub> N-TTz-CHO in chloroform  | 2.35         | 2.22         | 2.35          |
| Ph <sub>2</sub> N-TTz-CHO in DCM         | 2.35         | 2.22         | 2.34          |
| Ph <sub>2</sub> N-TTz-CHO in methanol    | 2.35         | 2.22         | 2.34          |
| Ph <sub>2</sub> N-TTz-COOH in toluene    | 2.45         | 2.33         | 2.46          |
| Ph <sub>2</sub> N-TTz-COOH in chloroform | 2.44         | 2.31         | 2.45          |
| Ph <sub>2</sub> N-TTz-COOH in DCM        | 2.43         | 2.30         | 2.44          |
| Ph <sub>2</sub> N-TTz-COOH in methanol   | 2.44         | 2.30         | 2.44          |
| <b>HandH</b>                             |              |              |               |
| Bu <sub>2</sub> N-TTz-Py in toluene      | 3.32         | 3.26         | 3.37          |
| Bu <sub>2</sub> N-TTz-Py in chloroform   | 3.30         | 3.23         | 3.35          |
| Bu <sub>2</sub> N-TTz-Py in DCM          | 3.29         | 3.22         | 3.34          |
| Bu <sub>2</sub> N-TTz-Py in methanol     | 3.29         | 3.22         | 3.35          |
| Ph <sub>2</sub> N-TTz-Py in toluene      | 3.26         | 3.19         | 3.29          |
| Ph <sub>2</sub> N-TTz-Py in chloroform   | 3.25         | 3.18         | 3.29          |
| Ph <sub>2</sub> N-TTz-Py in DCM          | 3.25         | 3.17         | 3.29          |
| Ph <sub>2</sub> N-TTz-Py in methanol     | 3.26         | 3.18         | 3.30          |

|                                          |      |      |      |
|------------------------------------------|------|------|------|
| Ph <sub>2</sub> N-TTz-CHO in toluene     | 3.18 | 3.08 | 3.19 |
| Ph <sub>2</sub> N-TTz-CHO in chloroform  | 3.17 | 3.08 | 3.19 |
| Ph <sub>2</sub> N-TTz-CHO in DCM         | 3.17 | 3.07 | 3.18 |
| Ph <sub>2</sub> N-TTz-CHO in methanol    | 3.18 | 3.08 | 3.20 |
| Ph <sub>2</sub> N-TTz-COOH in toluene    | 3.22 | 3.12 | 3.23 |
| Ph <sub>2</sub> N-TTz-COOH in chloroform | 3.21 | 3.12 | 3.23 |
| Ph <sub>2</sub> N-TTz-COOH in DCM        | 3.21 | 3.11 | 3.23 |
| Ph <sub>2</sub> N-TTz-COOH in methanol   | 3.22 | 3.12 | 3.24 |

**Eq. (2)**

|                                          |      |      |      |
|------------------------------------------|------|------|------|
| Bu <sub>2</sub> N-TTz-Py in toluene      | 3.02 | 2.94 | 3.06 |
| Bu <sub>2</sub> N-TTz-Py in chloroform   | 3.00 | 2.92 | 3.04 |
| Bu <sub>2</sub> N-TTz-Py in DCM          | 2.98 | 2.90 | 3.03 |
| Bu <sub>2</sub> N-TTz-Py in methanol     | 2.98 | 2.90 | 3.04 |
| Ph <sub>2</sub> N-TTz-Py in toluene      | 2.94 | 2.84 | 2.96 |
| Ph <sub>2</sub> N-TTz-Py in chloroform   | 2.93 | 2.83 | 2.95 |
| Ph <sub>2</sub> N-TTz-Py in DCM          | 2.93 | 2.82 | 2.96 |
| Ph <sub>2</sub> N-TTz-Py in methanol     | 2.94 | 2.83 | 2.97 |
| Ph <sub>2</sub> N-TTz-CHO in toluene     | 2.82 | 2.70 | 2.84 |
| Ph <sub>2</sub> N-TTz-CHO in chloroform  | 2.82 | 2.69 | 2.83 |
| Ph <sub>2</sub> N-TTz-CHO in DCM         | 2.82 | 2.69 | 2.83 |
| Ph <sub>2</sub> N-TTz-CHO in methanol    | 2.83 | 2.70 | 2.85 |
| Ph <sub>2</sub> N-TTz-COOH in toluene    | 2.88 | 2.76 | 2.91 |
| Ph <sub>2</sub> N-TTz-COOH in chloroform | 2.87 | 2.75 | 2.90 |
| Ph <sub>2</sub> N-TTz-COOH in DCM        | 2.87 | 2.74 | 2.90 |
| Ph <sub>2</sub> N-TTz-COOH in methanol   | 2.88 | 2.75 | 2.91 |

**Table S2. Emission spectra changes according to basis sets. Here, the results of Eq. (2) are obtained by using the same dielectric constants described in the manuscript.**

|                                          | <b>3-21G</b> | <b>6-31G</b> | <b>6-31G*</b> |
|------------------------------------------|--------------|--------------|---------------|
| <b>B3LYP</b>                             |              |              |               |
| Bu <sub>2</sub> N-TTz-Py in toluene      | 2.43         | 2.38         | 2.46          |
| Bu <sub>2</sub> N-TTz-Py in chloroform   | 2.32         | 2.28         | 2.35          |
| Bu <sub>2</sub> N-TTz-Py in DCM          | 2.26         | 2.22         | 2.29          |
| Bu <sub>2</sub> N-TTz-Py in methanol     | 2.21         | 2.16         | 2.24          |
| Ph <sub>2</sub> N-TTz-Py in toluene      | 1.87         | 1.84         | 2.07          |
| Ph <sub>2</sub> N-TTz-Py in chloroform   | 1.93         | 1.92         | 2.13          |
| Ph <sub>2</sub> N-TTz-Py in DCM          | 1.99         | 1.95         | 2.11          |
| Ph <sub>2</sub> N-TTz-Py in methanol     | 2.00         | 1.95         | 2.09          |
| Ph <sub>2</sub> N-TTz-CHO in toluene     | 1.82         | 1.78         | 2.02          |
| Ph <sub>2</sub> N-TTz-CHO in chloroform  | 1.93         | 1.85         | 2.01          |
| Ph <sub>2</sub> N-TTz-CHO in DCM         | 1.94         | 1.84         | 1.98          |
| Ph <sub>2</sub> N-TTz-CHO in methanol    | 1.92         | 1.82         | 1.95          |
| Ph <sub>2</sub> N-TTz-COOH in toluene    | 1.88         | 1.83         | 2.09          |
| Ph <sub>2</sub> N-TTz-COOH in chloroform | 1.99         | 1.90         | 2.08          |
| Ph <sub>2</sub> N-TTz-COOH in DCM        | 2.00         | 1.90         | 2.05          |
| Ph <sub>2</sub> N-TTz-COOH in methanol   | 1.98         | 1.88         | 2.02          |
| <b>HandH</b>                             |              |              |               |
| Bu <sub>2</sub> N-TTz-Py in toluene      | 2.80         | 2.77         | 2.82          |
| Bu <sub>2</sub> N-TTz-Py in chloroform   | 2.68         | 2.65         | 2.71          |
| Bu <sub>2</sub> N-TTz-Py in DCM          | 2.61         | 2.58         | 2.64          |
| Bu <sub>2</sub> N-TTz-Py in methanol     | 2.55         | 2.52         | 2.59          |
| Ph <sub>2</sub> N-TTz-Py in toluene      | 2.74         | 2.70         | 2.75          |
| Ph <sub>2</sub> N-TTz-Py in chloroform   | 2.64         | 2.60         | 2.66          |
| Ph <sub>2</sub> N-TTz-Py in DCM          | 2.58         | 2.54         | 2.60          |
| Ph <sub>2</sub> N-TTz-Py in methanol     | 2.53         | 2.49         | 2.55          |

|                                          |      |      |      |
|------------------------------------------|------|------|------|
| Ph <sub>2</sub> N-TTz-CHO in toluene     | 2.62 | 2.57 | 2.63 |
| Ph <sub>2</sub> N-TTz-CHO in chloroform  | 2.52 | 2.47 | 2.53 |
| Ph <sub>2</sub> N-TTz-CHO in DCM         | 2.47 | 2.42 | 2.47 |
| Ph <sub>2</sub> N-TTz-CHO in methanol    | 2.42 | 2.36 | 2.42 |
| Ph <sub>2</sub> N-TTz-COOH in toluene    | 2.66 | 2.61 | 2.67 |
| Ph <sub>2</sub> N-TTz-COOH in chloroform | 2.56 | 2.51 | 2.57 |
| Ph <sub>2</sub> N-TTz-COOH in DCM        | 2.51 | 2.45 | 2.52 |
| Ph <sub>2</sub> N-TTz-COOH in methanol   | 2.46 | 2.40 | 2.47 |

**Eq. (2)**

|                                          |      |      |      |
|------------------------------------------|------|------|------|
| Bu <sub>2</sub> N-TTz-Py in toluene      | 2.49 | 2.47 | 2.53 |
| Bu <sub>2</sub> N-TTz-Py in chloroform   | 2.37 | 2.36 | 2.42 |
| Bu <sub>2</sub> N-TTz-Py in DCM          | 2.31 | 2.29 | 2.35 |
| Bu <sub>2</sub> N-TTz-Py in methanol     | 2.24 | 2.23 | 2.29 |
| Ph <sub>2</sub> N-TTz-Py in toluene      | 2.41 | 2.38 | 2.44 |
| Ph <sub>2</sub> N-TTz-Py in chloroform   | 2.31 | 2.28 | 2.34 |
| Ph <sub>2</sub> N-TTz-Py in DCM          | 2.25 | 2.22 | 2.29 |
| Ph <sub>2</sub> N-TTz-Py in methanol     | 2.20 | 2.17 | 2.23 |
| Ph <sub>2</sub> N-TTz-CHO in toluene     | 2.30 | 2.25 | 2.32 |
| Ph <sub>2</sub> N-TTz-CHO in chloroform  | 2.20 | 2.15 | 2.21 |
| Ph <sub>2</sub> N-TTz-CHO in DCM         | 2.14 | 2.09 | 2.16 |
| Ph <sub>2</sub> N-TTz-CHO in methanol    | 2.08 | 2.04 | 2.10 |
| Ph <sub>2</sub> N-TTz-COOH in toluene    | 2.33 | 2.29 | 2.35 |
| Ph <sub>2</sub> N-TTz-COOH in chloroform | 2.23 | 2.19 | 2.26 |
| Ph <sub>2</sub> N-TTz-COOH in DCM        | 2.17 | 2.13 | 2.20 |
| Ph <sub>2</sub> N-TTz-COOH in methanol   | 2.12 | 2.08 | 2.15 |

**Table S3. Dipole moment [debye] of asymmetric TTz dyes in the ground and excited states calculated by the dielectric-dependent density functional theory (DFT) method using Eq. (2).**

|                      | toluene | chloroform | dichloromethane | methanol |
|----------------------|---------|------------|-----------------|----------|
| <b>Ground-state</b>  |         |            |                 |          |
| Bu2N-TTz-Py          | 8.78    | 9.58       | 9.85            | 10.1     |
| Ph2N-TTz-Py          | 6.23    | 6.62       | 6.78            | 6.93     |
| Ph2N-TTz-CHO         | 6.88    | 7.18       | 7.34            | 7.51     |
| Ph2N-TTz-COOH        | 4.86    | 5.13       | 5.28            | 5.44     |
| <b>Excited-state</b> |         |            |                 |          |
| Bu2N-TTz-Py          | 18.70   | 21.12      | 22.68           | 24.10    |
| Ph2N-TTz-Py          | 17.14   | 18.86      | 19.91           | 20.91    |
| Ph2N-TTz-CHO         | 20.77   | 22.81      | 24.04           | 25.24    |
| Ph2N-TTz-COOH        | 16.89   | 18.62      | 19.66           | 20.64    |

**Table S4. Charge distributions in the asymmetric TTz dyes in the ground and excited states.**

|                                 | ground-state |          |       | excited-state |          |       |
|---------------------------------|--------------|----------|-------|---------------|----------|-------|
|                                 | Acceptor     | TTz-core | Donor | Acceptor      | TTz-core | Donor |
| <b>Bu<sub>2</sub>N-TTz-Py</b>   |              |          |       |               |          |       |
| toluene                         | 0.009        | -0.106   | 0.096 | -0.246        | 0.032    | 0.214 |
| chloroform                      | -0.002       | -0.120   | 0.122 | -0.277        | 0.039    | 0.239 |
| dichloromethane                 | 0.024        | -0.126   | 0.102 | -0.299        | 0.044    | 0.255 |
| methanol                        | 0.016        | -0.128   | 0.113 | -0.317        | 0.041    | 0.276 |
| <b>Ph<sub>2</sub>N-TTz-Py</b>   |              |          |       |               |          |       |
| toluene                         | 0.007        | -0.102   | 0.095 | -0.230        | 0.046    | 0.185 |
| chloroform                      | 0.008        | -0.112   | 0.105 | -0.254        | 0.038    | 0.216 |
| dichloromethane                 | 0.044        | -0.157   | 0.114 | -0.269        | 0.034    | 0.235 |
| methanol                        | 0.042        | -0.168   | 0.126 | -0.284        | 0.031    | 0.252 |
| <b>Ph<sub>2</sub>N-TTz-CHO</b>  |              |          |       |               |          |       |
| toluene                         | -0.005       | -0.087   | 0.092 | -0.330        | 0.143    | 0.186 |
| chloroform                      | 0.031        | -0.134   | 0.102 | -0.357        | 0.139    | 0.218 |
| dichloromethane                 | 0.037        | -0.144   | 0.107 | -0.375        | 0.138    | 0.237 |
| methanol                        | 0.046        | -0.161   | 0.116 | -0.393        | 0.137    | 0.255 |
| <b>Ph<sub>2</sub>N-TTz-COOH</b> |              |          |       |               |          |       |
| toluene                         | 0.003        | -0.086   | 0.083 | -0.301        | 0.133    | 0.168 |
| chloroform                      | 0.038        | -0.137   | 0.099 | -0.323        | 0.124    | 0.199 |
| dichloromethane                 | 0.046        | -0.153   | 0.107 | -0.337        | 0.119    | 0.218 |
| methanol                        | 0.052        | -0.173   | 0.121 | -0.351        | 0.116    | 0.236 |

**Table S5. Major contributions (configurational interaction (CI) coefficients) of electronic transition for photon absorption.**

|                                 | toluene | chloroform | dichloromethane | methanol |
|---------------------------------|---------|------------|-----------------|----------|
| <b>Bu<sub>2</sub>N-TTz-Py</b>   |         |            |                 |          |
| H → L                           | 0.67    | 0.67       | 0.66            | 0.67     |
| H-1 → L                         | -0.13   | -0.12      | -0.12           | -0.12    |
| <b>Ph<sub>2</sub>N-TTz-Py</b>   |         |            |                 |          |
| H → L                           | 0.66    | 0.66       | 0.66            | 0.66     |
| H-1 → L                         | 0.15    | 0.15       | 0.15            | 0.14     |
| <b>Ph<sub>2</sub>N-TTz-CHO</b>  |         |            |                 |          |
| H → L                           | 0.65    | 0.65       | 0.65            | 0.65     |
| H-1 → L                         | -0.17   | -0.17      | -0.16           | -0.16    |
| <b>Ph<sub>2</sub>N-TTz-COOH</b> |         |            |                 |          |
| H → L                           | 0.65    | 0.65       | 0.65            | 0.65     |
| H-1 → L                         | 0.16    | -0.16      | -0.16           | -0.16    |

\* HOMO=H, HOMO-1=H-1, LUMO=L



**Table S6. Major contributions (CI coefficients) of electronic transition for photon emission.**

|                                 | <b>toluene</b> | <b>chloroform</b> | <b>dichloromethane</b> | <b>methanol</b> |
|---------------------------------|----------------|-------------------|------------------------|-----------------|
| <b>Bu<sub>2</sub>N-TTz-Py</b>   |                |                   |                        |                 |
| H → L                           | 0.69           | 0.69              | 0.69                   | 0.69            |
| <b>Ph<sub>2</sub>N-TTz-Py</b>   |                |                   |                        |                 |
| H → L                           | 0.69           | 0.69              | 0.69                   | 0.69            |
| <b>Ph<sub>2</sub>N-TTz-CHO</b>  |                |                   |                        |                 |
| H → L                           | 0.69           | 0.69              | 0.69                   | 0.69            |
| <b>Ph<sub>2</sub>N-TTz-COOH</b> |                |                   |                        |                 |
| H → L                           | 0.69           | 0.69              | 0.69                   | 0.69            |

\* HOMO=H, LUMO=L

**Table S7. Contributions [eV] of geometrical changes and solvent reorientation effect to the Stokes shift [eV] of asymmetric TTz dyes.**

|                                 | geometrical change | solvent reorientation | Stokes shift |
|---------------------------------|--------------------|-----------------------|--------------|
| <b>Bu<sub>2</sub>N-TTz-Py</b>   |                    |                       |              |
| toluene                         | 0.56               | 0.01                  | 0.57         |
| chloroform                      | 0.57               | 0.09                  | 0.65         |
| dichloromethane                 | 0.59               | 0.13                  | 0.72         |
| methanol                        | 0.60               | 0.19                  | 0.79         |
| <b>Ph<sub>2</sub>N-TTz-Py</b>   |                    |                       |              |
| toluene                         | 0.54               | 0.01                  | 0.54         |
| chloroform                      | 0.56               | 0.07                  | 0.64         |
| dichloromethane                 | 0.60               | 0.11                  | 0.71         |
| methanol                        | 0.64               | 0.16                  | 0.80         |
| <b>Ph<sub>2</sub>N-TTz-CHO</b>  |                    |                       |              |
| toluene                         | 0.55               | 0.01                  | 0.56         |
| chloroform                      | 0.60               | 0.08                  | 0.67         |
| dichloromethane                 | 0.62               | 0.12                  | 0.74         |
| methanol                        | 0.64               | 0.17                  | 0.81         |
| <b>Ph<sub>2</sub>N-TTz-COOH</b> |                    |                       |              |
| toluene                         | 0.59               | 0.01                  | 0.60         |
| chloroform                      | 0.63               | 0.07                  | 0.70         |
| dichloromethane                 | 0.65               | 0.11                  | 0.76         |
| methanol                        | 0.67               | 0.16                  | 0.84         |

**Bu<sub>2</sub>N-TTz-Py**

**HOMO**

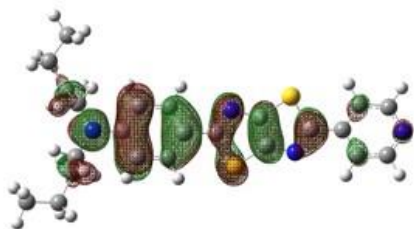

**LUMO**

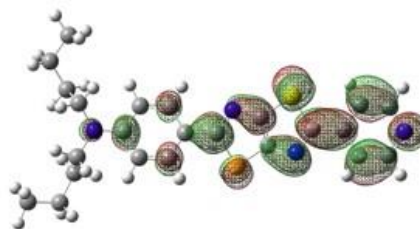

**Ph<sub>2</sub>N-TTz-Py**

**HOMO**

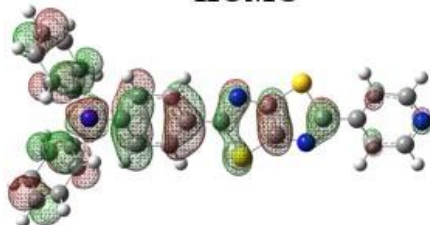

**LUMO**

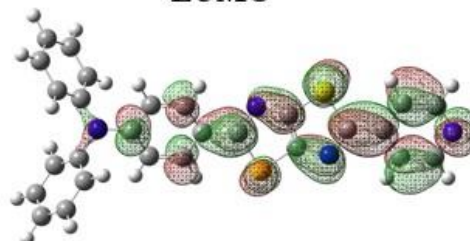

**Ph<sub>2</sub>N-TTz-CHO**

**HOMO**

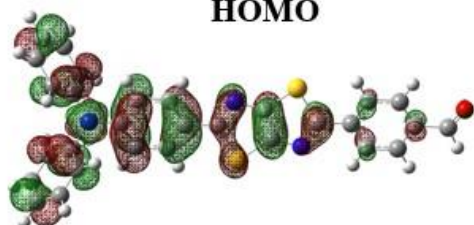

**LUMO**

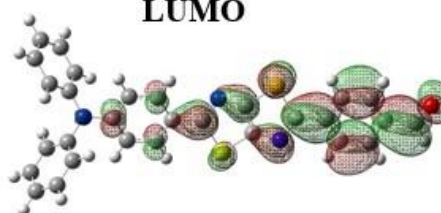

**Ph<sub>2</sub>N-TTz-COOH**

**HOMO**

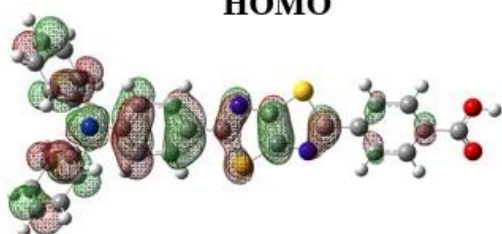

**LUMO**

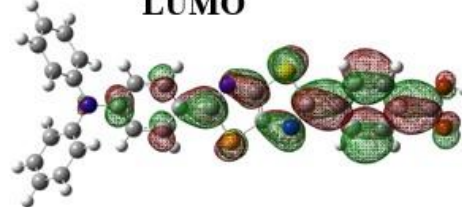

**Figure S1.** HOMO and LUMO shapes of TTz-based dyes calculated from the dielectric DFT method of Eq. (2). These are obtained by the ground-state optimized structure in DCM.

We show XYZ coordinates of asymmetric TTz dyes for absorption cases. These coordinates are obtained based on the dielectric DFT method of Eq. (2) with the 6-31+G\* basis set.

### Bu<sub>2</sub>N-TTz-Py in absorption state

| toluene |         |         |         | chloroform |         |         |         |
|---------|---------|---------|---------|------------|---------|---------|---------|
| C       | -3.2479 | -0.7372 | -0.0152 | C          | -3.2400 | -0.7477 | -0.0094 |
| C       | -2.8983 | 0.6194  | -0.0760 | C          | -2.8924 | 0.6047  | -0.1442 |
| S       | -4.3920 | 1.6034  | -0.0586 | S          | -4.3833 | 1.5904  | -0.1431 |
| C       | -5.3332 | 0.0238  | 0.0422  | C          | -5.3244 | 0.0200  | 0.0432  |
| N       | -4.5863 | -1.0706 | 0.0462  | N          | -4.5774 | -1.0749 | 0.0913  |
| S       | -1.7485 | -1.7222 | -0.0358 | S          | -1.7399 | -1.7323 | 0.0004  |
| C       | -0.8057 | -0.1302 | -0.1526 | C          | -0.7986 | -0.1489 | -0.2061 |
| N       | -1.5615 | 0.9624  | -0.1547 | N          | -1.5571 | 0.9426  | -0.2570 |
| C       | -6.8408 | -0.0003 | 0.0937  | C          | -6.8314 | 0.0005  | 0.1174  |
| C       | 0.6909  | -0.1159 | -0.2131 | C          | 0.6969  | -0.1316 | -0.2809 |
| C       | -7.5511 | -1.2233 | -0.1589 | C          | -7.5462 | -1.2352 | -0.0487 |
| C       | -8.9750 | -1.2123 | -0.1007 | C          | -8.9692 | -1.2198 | 0.0305  |
| N       | -9.7228 | -0.1067 | 0.1776  | N          | -9.7125 | -0.0974 | 0.2515  |
| C       | -9.0462 | 1.0491  | 0.4163  | C          | -9.0320 | 1.0711  | 0.4080  |
| C       | -7.6235 | 1.1635  | 0.3920  | C          | -7.6098 | 1.1816  | 0.3555  |
| C       | 1.4120  | 1.1061  | 0.0366  | C          | 1.4116  | 1.1034  | -0.0788 |
| C       | 2.8280  | 1.1554  | -0.0125 | C          | 2.8265  | 1.1583  | -0.1282 |
| C       | 3.6243  | -0.0208 | -0.3315 | C          | 3.6335  | -0.0230 | -0.3977 |
| C       | 2.8876  | -1.2511 | -0.5623 | C          | 2.9028  | -1.2665 | -0.5888 |
| C       | 1.4675  | -1.2861 | -0.5087 | C          | 1.4828  | -1.3070 | -0.5343 |
| N       | 5.0298  | 0.0365  | -0.3909 | N          | 5.0354  | 0.0434  | -0.4509 |
| C       | 5.7350  | 1.3337  | -0.6488 | C          | 5.7476  | 1.3516  | -0.6270 |
| C       | 5.8464  | -1.2104 | -0.5243 | C          | 5.8633  | -1.2005 | -0.5538 |
| C       | 6.4411  | 1.9455  | 0.6240  | C          | 6.3543  | 1.9467  | 0.7049  |
| C       | 7.2553  | 3.2680  | 0.3326  | C          | 7.1835  | 3.2745  | 0.4893  |
| C       | 6.3721  | 4.5266  | -0.0237 | C          | 6.3271  | 4.5318  | 0.0696  |

|   |         |         |         |   |         |         |         |
|---|---------|---------|---------|---|---------|---------|---------|
| C | 5.9484  | -2.0599 | 0.8056  | C | 5.9631  | -2.0217 | 0.7949  |
| C | 6.6570  | -3.4587 | 0.6151  | C | 6.6583  | -3.4307 | 0.6356  |
| C | 8.1820  | -3.3825 | 0.2164  | C | 8.1838  | -3.3786 | 0.2360  |
| H | -7.0025 | -2.1645 | -0.3999 | H | -7.0033 | -2.1909 | -0.2411 |
| H | -9.5481 | -2.1536 | -0.2952 | H | -9.5441 | -2.1714 | -0.0966 |
| H | -9.6731 | 1.9466  | 0.6481  | H | -9.6540 | 1.9826  | 0.5938  |
| H | -7.1525 | 2.1516  | 0.6201  | H | -7.1382 | 2.1820  | 0.5180  |
| H | 0.8465  | 2.0337  | 0.2960  | H | 0.8422  | 2.0386  | 0.1424  |
| H | 3.3232  | 2.1228  | 0.2373  | H | 3.3170  | 2.1344  | 0.0805  |
| H | 3.4180  | -2.2007 | -0.8015 | H | 3.4373  | -2.2224 | -0.7907 |
| H | 0.9641  | -2.2619 | -0.7276 | H | 0.9857  | -2.2938 | -0.7132 |
| H | 6.5176  | 1.1495  | -1.4496 | H | 6.5898  | 1.1831  | -1.3658 |
| H | 5.0040  | 2.0628  | -1.0972 | H | 5.0516  | 2.0927  | -1.1137 |
| H | 5.4537  | -1.8569 | -1.3741 | H | 5.4787  | -1.8658 | -1.3922 |
| H | 6.8782  | -0.8869 | -0.8373 | H | 6.8937  | -0.8754 | -0.8700 |
| H | 5.6639  | 2.1413  | 1.4296  | H | 5.5191  | 2.1342  | 1.4525  |
| H | 7.1478  | 1.1665  | 1.0499  | H | 7.0323  | 1.1664  | 1.1730  |
| H | 7.8785  | 3.5092  | 1.2494  | H | 7.7269  | 3.5115  | 1.4568  |
| H | 7.9972  | 3.0756  | -0.5084 | H | 7.9931  | 3.0907  | -0.2889 |
| H | 5.6171  | 4.7392  | 0.7974  | H | 5.4878  | 4.7186  | 0.8117  |
| H | 7.0178  | 5.4508  | -0.1406 | H | 6.9717  | 5.4640  | 0.0388  |
| H | 5.8001  | 4.3937  | -0.9928 | H | 5.8609  | 4.4150  | -0.9567 |
| H | 6.5093  | -1.4494 | 1.5824  | H | 6.5315  | -1.4004 | 1.5568  |
| H | 4.9117  | -2.2301 | 1.2267  | H | 4.9262  | -2.1742 | 1.2228  |
| H | 6.5621  | -4.0368 | 1.5867  | H | 6.5583  | -3.9848 | 1.6211  |
| H | 6.0929  | -4.0642 | -0.1659 | H | 6.0868  | -4.0473 | -0.1314 |
| H | 8.7687  | -2.7646 | 0.9674  | H | 8.7761  | -2.7491 | 0.9732  |
| H | 8.6436  | -4.4173 | 0.1904  | H | 8.6348  | -4.4188 | 0.2342  |
| H | 8.3380  | -2.9209 | -0.8070 | H | 8.3438  | -2.9412 | -0.7976 |

**Bu<sub>2</sub>N-TTz-Py in absorption state**

| <b>DCM</b> |         |         | <b>methanol</b> |          |         |         |         |
|------------|---------|---------|-----------------|----------|---------|---------|---------|
| <b>C</b>   | -3.2334 | -0.7415 | 0.0137          | <b>C</b> | -3.2327 | -0.7405 | -0.0036 |
| <b>C</b>   | -2.8923 | 0.6101  | -0.1352         | <b>C</b> | -2.8950 | 0.6143  | -0.1300 |
| <b>S</b>   | -4.3909 | 1.5861  | -0.1654         | <b>S</b> | -4.3957 | 1.5871  | -0.1465 |
| <b>C</b>   | -5.3225 | 0.0130  | 0.0430          | <b>C</b> | -5.3248 | 0.0075  | 0.0130  |
| <b>N</b>   | -4.5700 | -1.0764 | 0.1082          | <b>N</b> | -4.5694 | -1.0805 | 0.0742  |
| <b>S</b>   | -1.7287 | -1.7192 | 0.0427          | <b>S</b> | -1.7259 | -1.7154 | 0.0047  |
| <b>C</b>   | -0.7940 | -0.1329 | -0.1806         | <b>C</b> | -0.7947 | -0.1238 | -0.1901 |
| <b>N</b>   | -1.5573 | 0.9541  | -0.2464         | <b>N</b> | -1.5605 | 0.9630  | -0.2367 |
| <b>C</b>   | -6.8297 | -0.0133 | 0.1089          | <b>C</b> | -6.8313 | -0.0214 | 0.0922  |
| <b>C</b>   | 0.7009  | -0.1168 | -0.2501         | <b>C</b> | 0.7000  | -0.1038 | -0.2561 |
| <b>C</b>   | -7.5403 | -1.2413 | -0.1182         | <b>C</b> | -7.5056 | -1.1861 | 0.5955  |
| <b>C</b>   | -8.9635 | -1.2325 | -0.0453         | <b>C</b> | -8.9296 | -1.1822 | 0.6523  |
| <b>N</b>   | -9.7095 | -0.1223 | 0.2240          | <b>N</b> | -9.7080 | -0.1317 | 0.2612  |
| <b>C</b>   | -9.0324 | 1.0395  | 0.4377          | <b>C</b> | -9.0649 | 0.9712  | -0.2135 |
| <b>C</b>   | -7.6101 | 1.1547  | 0.3970          | <b>C</b> | -7.6462 | 1.0831  | -0.3232 |
| <b>C</b>   | 1.4214  | 1.1198  | -0.0804         | <b>C</b> | 1.4204  | 1.1240  | -0.0298 |
| <b>C</b>   | 2.8372  | 1.1716  | -0.1376         | <b>C</b> | 2.8364  | 1.1789  | -0.0841 |
| <b>C</b>   | 3.6389  | -0.0217 | -0.3832         | <b>C</b> | 3.6387  | -0.0023 | -0.3837 |
| <b>C</b>   | 2.9006  | -1.2676 | -0.5338         | <b>C</b> | 2.9000  | -1.2406 | -0.5910 |
| <b>C</b>   | 1.4817  | -1.3020 | -0.4742         | <b>C</b> | 1.4813  | -1.2779 | -0.5337 |
| <b>N</b>   | 5.0381  | 0.0301  | -0.4595         | <b>N</b> | 5.0369  | 0.0528  | -0.4571 |
| <b>C</b>   | 5.7566  | 1.3326  | -0.6489         | <b>C</b> | 5.7564  | 1.3631  | -0.5848 |
| <b>C</b>   | 5.8547  | -1.2222 | -0.5634         | <b>C</b> | 5.8540  | -1.1937 | -0.6200 |
| <b>C</b>   | 6.3409  | 1.9529  | 0.6816          | <b>C</b> | 6.3398  | 1.9192  | 0.7741  |
| <b>C</b>   | 7.1298  | 3.3046  | 0.4616          | <b>C</b> | 7.1347  | 3.2763  | 0.6186  |
| <b>C</b>   | 6.2300  | 4.5440  | 0.0805          | <b>C</b> | 6.2416  | 4.5354  | 0.2898  |
| <b>C</b>   | 6.0021  | -2.0182 | 0.7959          | <b>C</b> | 6.0005  | -2.0530 | 0.7003  |
| <b>C</b>   | 6.7015  | -3.4253 | 0.6342          | <b>C</b> | 6.7011  | -3.4505 | 0.4724  |
| <b>C</b>   | 8.2138  | -3.3673 | 0.1868          | <b>C</b> | 8.2142  | -3.3698 | 0.0314  |
| <b>H</b>   | -6.9953 | -2.1860 | -0.3537         | <b>H</b> | -6.9327 | -2.0779 | 0.9435  |
| <b>H</b>   | -9.5356 | -2.1778 | -0.2202         | <b>H</b> | -9.4733 | -2.0787 | 1.0420  |
| <b>H</b>   | -9.6567 | 1.9401  | 0.6624          | <b>H</b> | -9.7156 | 1.8225  | -0.5344 |

|          |         |         |         |          |         |         |         |
|----------|---------|---------|---------|----------|---------|---------|---------|
| <b>H</b> | -7.1387 | 2.1463  | 0.6066  | <b>H</b> | -7.2058 | 2.0201  | -0.7440 |
| <b>H</b> | 0.8575  | 2.0626  | 0.1226  | <b>H</b> | 0.8571  | 2.0567  | 0.2173  |
| <b>H</b> | 3.3248  | 2.1566  | 0.0443  | <b>H</b> | 3.3234  | 2.1547  | 0.1430  |
| <b>H</b> | 3.4304  | -2.2305 | -0.7107 | <b>H</b> | 3.4299  | -2.1943 | -0.8117 |
| <b>H</b> | 0.9823  | -2.2922 | -0.6268 | <b>H</b> | 0.9819  | -2.2598 | -0.7326 |
| <b>H</b> | 6.6097  | 1.1482  | -1.3698 | <b>H</b> | 6.6096  | 1.2117  | -1.3126 |
| <b>H</b> | 5.0675  | 2.0568  | -1.1676 | <b>H</b> | 5.0677  | 2.1112  | -1.0690 |
| <b>H</b> | 5.4296  | -1.9009 | -1.3685 | <b>H</b> | 5.4296  | -1.8334 | -1.4565 |
| <b>H</b> | 6.8730  | -0.9125 | -0.9281 | <b>H</b> | 6.8723  | -0.8666 | -0.9683 |
| <b>H</b> | 5.5004  | 2.1177  | 1.4280  | <b>H</b> | 5.4983  | 2.0534  | 1.5256  |
| <b>H</b> | 7.0397  | 1.1931  | 1.1510  | <b>H</b> | 7.0352  | 1.1361  | 1.2090  |
| <b>H</b> | 7.6924  | 3.5452  | 1.4170  | <b>H</b> | 7.6934  | 3.4710  | 1.5867  |
| <b>H</b> | 7.9232  | 3.1510  | -0.3393 | <b>H</b> | 7.9311  | 3.1555  | -0.1848 |
| <b>H</b> | 5.4291  | 4.7206  | 0.8658  | <b>H</b> | 5.4356  | 4.6774  | 1.0769  |
| <b>H</b> | 6.8549  | 5.4874  | 0.0111  | <b>H</b> | 6.8705  | 5.4786  | 0.2692  |
| <b>H</b> | 5.7111  | 4.4116  | -0.9181 | <b>H</b> | 5.7293  | 4.4514  | -0.7174 |
| <b>H</b> | 6.5914  | -1.3822 | 1.5293  | <b>H</b> | 6.5888  | -1.4524 | 1.4636  |
| <b>H</b> | 4.9796  | -2.1706 | 1.2575  | <b>H</b> | 4.9776  | -2.2290 | 1.1528  |
| <b>H</b> | 6.6357  | -3.9675 | 1.6287  | <b>H</b> | 6.6340  | -4.0395 | 1.4399  |
| <b>H</b> | 6.1120  | -4.0553 | -0.1074 | <b>H</b> | 6.1133  | -4.0441 | -0.2996 |
| <b>H</b> | 8.8237  | -2.7255 | 0.8981  | <b>H</b> | 8.8219  | -2.7621 | 0.7739  |
| <b>H</b> | 8.6716  | -4.4043 | 0.1827  | <b>H</b> | 8.6727  | -4.4053 | -0.0213 |
| <b>H</b> | 8.3388  | -2.9412 | -0.8559 | <b>H</b> | 8.3407  | -2.8939 | -0.9893 |

### Ph2N-TTz-Py in absorption state

| toluene |         |         |         | chloroform |         |         |         |
|---------|---------|---------|---------|------------|---------|---------|---------|
| C       | 1.2273  | -0.1019 | -0.0628 | C          | 1.2282  | -0.1005 | -0.0616 |
| N       | 1.9800  | 0.9599  | 0.2033  | N          | 1.9821  | 0.9680  | 0.1758  |
| C       | 3.3190  | 0.6227  | 0.1452  | C          | 3.3213  | 0.6279  | 0.1280  |
| C       | 3.6715  | -0.6999 | -0.1693 | C          | 3.6721  | -0.7030 | -0.1506 |
| S       | 2.1727  | -1.6581 | -0.4046 | S          | 2.1723  | -1.6657 | -0.3608 |
| S       | 4.8124  | 1.5817  | 0.3778  | S          | 4.8153  | 1.5915  | 0.3348  |
| C       | 5.7585  | 0.0405  | 0.0131  | C          | 5.7601  | 0.0408  | 0.0124  |
| N       | 5.0108  | -1.0240 | -0.2449 | N          | 5.0114  | -1.0299 | -0.2174 |
| C       | 7.2675  | 0.0118  | 0.0160  | C          | 7.2693  | 0.0110  | 0.0159  |
| C       | -0.2749 | -0.0872 | -0.0602 | C          | -0.2739 | -0.0858 | -0.0591 |
| C       | 8.0661  | 1.1758  | 0.2731  | C          | 8.0683  | 1.1787  | 0.2554  |
| C       | 9.4892  | 1.0543  | 0.2546  | C          | 9.4913  | 1.0567  | 0.2389  |
| N       | 10.1531 | -0.1076 | 0.0056  | N          | 10.1547 | -0.1101 | 0.0078  |
| C       | 9.3909  | -1.2124 | -0.2385 | C          | 9.3921  | -1.2189 | -0.2193 |
| C       | 7.9649  | -1.2181 | -0.2471 | C          | 7.9662  | -1.2234 | -0.2280 |
| C       | -1.0553 | -1.1042 | -0.7121 | C          | -1.0539 | -1.1101 | -0.7007 |
| C       | -2.4784 | -1.0652 | -0.6972 | C          | -2.4770 | -1.0716 | -0.6863 |
| C       | -3.1786 | -0.0050 | -0.0175 | C          | -3.1788 | -0.0046 | -0.0177 |
| C       | -2.3983 | 1.0162  | 0.6382  | C          | -2.3985 | 1.0238  | 0.6279  |
| C       | -0.9774 | 0.9772  | 0.6117  | C          | -0.9774 | 0.9849  | 0.6021  |
| N       | -4.6137 | 0.0339  | 0.0076  | N          | -4.6125 | 0.0338  | 0.0068  |
| C       | -5.3872 | -1.1982 | 0.0911  | C          | -5.3873 | -1.1988 | 0.0822  |
| C       | -5.3217 | 1.3060  | -0.0570 | C          | -5.3223 | 1.3060  | -0.0499 |
| C       | -6.3194 | 1.6279  | 0.9224  | C          | -6.3073 | 1.6278  | 0.9421  |
| C       | -7.0277 | 2.8683  | 0.8461  | C          | -7.0179 | 2.8678  | 0.8736  |
| C       | -6.7368 | 3.8066  | -0.1952 | C          | -6.7416 | 3.8048  | -0.1733 |
| C       | -5.7359 | 3.4878  | -1.1686 | C          | -5.7532 | 3.4855  | -1.1598 |
| C       | -5.0381 | 2.2414  | -1.1080 | C          | -5.0532 | 2.2397  | -1.1062 |
| C       | -5.1234 | -2.1499 | 1.1327  | C          | -5.1370 | -2.1486 | 1.1288  |
| C       | -5.8854 | -3.3568 | 1.2137  | C          | -5.9009 | -3.3552 | 1.2023  |
| C       | -6.9307 | -3.6191 | 0.2704  | C          | -6.9345 | -3.6183 | 0.2459  |
| C       | -7.2014 | -2.6643 | -0.7611 | C          | -7.1917 | -2.6650 | -0.7909 |



|          |         |         |         |          |         |         |         |
|----------|---------|---------|---------|----------|---------|---------|---------|
| <b>C</b> | -6.4297 | -1.4636 | -0.8580 | <b>C</b> | -6.4179 | -1.4647 | -0.8797 |
| <b>H</b> | 7.6104  | 2.1755  | 0.4868  | <b>H</b> | 7.6140  | 2.1817  | 0.4544  |
| <b>H</b> | 10.1275 | 1.9528  | 0.4530  | <b>H</b> | 10.1289 | 1.9583  | 0.4238  |
| <b>H</b> | 9.9533  | -2.1595 | -0.4411 | <b>H</b> | 9.9530  | -2.1697 | -0.4072 |
| <b>H</b> | 7.4049  | -2.1615 | -0.4542 | <b>H</b> | 7.4075  | -2.1704 | -0.4210 |
| <b>H</b> | -0.5545 | -1.9313 | -1.2776 | <b>H</b> | -0.5533 | -1.9428 | -1.2580 |
| <b>H</b> | -3.0538 | -1.8632 | -1.2280 | <b>H</b> | -3.0507 | -1.8753 | -1.2102 |
| <b>H</b> | -2.9133 | 1.8465  | 1.1819  | <b>H</b> | -2.9126 | 1.8590  | 1.1646  |
| <b>H</b> | -0.3961 | 1.7722  | 1.1401  | <b>H</b> | -0.3982 | 1.7851  | 1.1250  |
| <b>H</b> | -6.5452 | 0.9003  | 1.7429  | <b>H</b> | -6.5209 | 0.9018  | 1.7673  |
| <b>H</b> | -7.8055 | 3.1068  | 1.6165  | <b>H</b> | -7.7857 | 3.1068  | 1.6539  |
| <b>H</b> | -7.2879 | 4.7802  | -0.2492 | <b>H</b> | -7.2944 | 4.7777  | -0.2216 |
| <b>H</b> | -5.5042 | 4.2093  | -1.9940 | <b>H</b> | -5.5335 | 4.2058  | -1.9895 |
| <b>H</b> | -4.2640 | 1.9918  | -1.8777 | <b>H</b> | -4.2899 | 1.9893  | -1.8864 |
| <b>H</b> | -4.3149 | -1.9435 | 1.8796  | <b>H</b> | -4.3386 | -1.9411 | 1.8861  |
| <b>H</b> | -5.6690 | -4.0913 | 2.0319  | <b>H</b> | -5.6956 | -4.0882 | 2.0245  |
| <b>H</b> | -7.5320 | -4.5615 | 0.3408  | <b>H</b> | -7.5372 | -4.5602 | 0.3102  |
| <b>H</b> | -8.0141 | -2.8585 | -1.5077 | <b>H</b> | -7.9947 | -2.8600 | -1.5476 |
| <b>H</b> | -6.6410 | -0.7229 | -1.6705 | <b>H</b> | -6.6177 | -0.7257 | -1.6968 |

### Ph2N-TTz-Py in absorption state

| DCM |         |         | methanol |   |         |         |         |
|-----|---------|---------|----------|---|---------|---------|---------|
| C   | 1.2293  | -0.1104 | -0.0385  | C | 1.2308  | -0.1027 | -0.0520 |
| N   | 1.9842  | 0.9652  | 0.1616   | N | 1.9871  | 0.9697  | 0.1614  |
| C   | 3.3237  | 0.6233  | 0.1231   | C | 3.3268  | 0.6263  | 0.1196  |
| C   | 3.6731  | -0.7163 | -0.1115  | C | 3.6738  | -0.7109 | -0.1306 |
| S   | 2.1724  | -1.6852 | -0.2847  | S | 2.1719  | -1.6746 | -0.3200 |
| S   | 4.8187  | 1.5933  | 0.2908   | S | 4.8239  | 1.5917  | 0.2988  |
| C   | 5.7611  | 0.0318  | 0.0261   | C | 5.7626  | 0.0365  | -0.0052 |
| N   | 5.0130  | -1.0463 | -0.1692  | N | 5.0138  | -1.0409 | -0.2012 |
| C   | 7.2702  | 0.0083  | 0.0155   | C | 7.2719  | 0.0091  | 0.0010  |
| C   | -0.2728 | -0.0947 | -0.0374  | C | -0.2712 | -0.0877 | -0.0465 |
| C   | 8.0638  | 1.1013  | 0.5000   | C | 8.0652  | 1.1876  | -0.2006 |
| C   | 9.4872  | 0.9949  | 0.4496   | C | 9.4887  | 1.0707  | -0.1791 |
| N   | 10.1543 | -0.0919 | -0.0301  | N | 10.1544 | -0.1024 | 0.0172  |
| C   | 9.3964  | -1.1314 | -0.4869  | C | 9.3961  | -1.2223 | 0.2044  |
| C   | 7.9703  | -1.1403 | -0.4927  | C | 7.9699  | -1.2303 | 0.2100  |
| C   | -1.0530 | -1.1333 | -0.6557  | C | -1.0517 | -1.1076 | -0.6953 |
| C   | -2.4761 | -1.0918 | -0.6466  | C | -2.4748 | -1.0684 | -0.6818 |
| C   | -3.1785 | -0.0071 | -0.0069  | C | -3.1779 | -0.0050 | -0.0068 |
| C   | -2.3976 | 1.0347  | 0.6172   | C | -2.3963 | 1.0179  | 0.6480  |
| C   | -0.9766 | 0.9923  | 0.5967   | C | -0.9752 | 0.9778  | 0.6230  |
| N   | -4.6113 | 0.0361  | 0.0110   | N | -4.6095 | 0.0351  | 0.0162  |
| C   | -5.3918 | -1.1933 | 0.0904   | C | -5.3898 | -1.1977 | 0.0349  |
| C   | -5.3180 | 1.3094  | -0.0671  | C | -5.3201 | 1.3092  | 0.0001  |
| C   | -6.2998 | 1.6508  | 0.9215   | C | -6.2887 | 1.6062  | 1.0156  |
| C   | -7.0085 | 2.8909  | 0.8323   | C | -7.0028 | 2.8464  | 0.9870  |
| C   | -6.7329 | 3.8081  | -0.2325  | C | -6.7454 | 3.8070  | -0.0437 |
| C   | -5.7474 | 3.4691  | -1.2157  | C | -5.7728 | 3.5119  | -1.0541 |
| C   | -5.0496 | 2.2230  | -1.1410  | C | -5.0698 | 2.2663  | -1.0397 |
| C   | -5.1663 | -2.1257 | 1.1579   | C | -5.1767 | -2.1729 | 1.0660  |
| C   | -5.9360 | -3.3285 | 1.2360   | C | -5.9468 | -3.3781 | 1.0851  |
| C   | -6.9506 | -3.6044 | 0.2625   | C | -6.9490 | -3.6137 | 0.0881  |
| C   | -7.1828 | -2.6681 | -0.7958  | C | -7.1687 | -2.6347 | -0.9339 |

|          |         |         |         |          |         |         |         |
|----------|---------|---------|---------|----------|---------|---------|---------|
| <b>C</b> | -6.4029 | -1.4716 | -0.8883 | <b>C</b> | -6.3882 | -1.4352 | -0.9672 |
| <b>H</b> | 7.6030  | 2.0267  | 0.9279  | <b>H</b> | 7.6037  | 2.1885  | -0.3912 |
| <b>H</b> | 10.1215 | 1.8377  | 0.8246  | <b>H</b> | 10.1237 | 1.9790  | -0.3366 |
| <b>H</b> | 9.9604  | -2.0155 | -0.8792 | <b>H</b> | 9.9590  | -2.1763 | 0.3671  |
| <b>H</b> | 7.4150  | -2.0236 | -0.8903 | <b>H</b> | 7.4140  | -2.1834 | 0.3820  |
| <b>H</b> | -0.5527 | -1.9801 | -1.1913 | <b>H</b> | -0.5516 | -1.9368 | -1.2579 |
| <b>H</b> | -3.0488 | -1.9068 | -1.1536 | <b>H</b> | -3.0465 | -1.8680 | -1.2135 |
| <b>H</b> | -2.9110 | 1.8831  | 1.1335  | <b>H</b> | -2.9086 | 1.8486  | 1.1932  |
| <b>H</b> | -0.3984 | 1.8036  | 1.1035  | <b>H</b> | -0.3978 | 1.7732  | 1.1555  |
| <b>H</b> | -6.5120 | 0.9407  | 1.7608  | <b>H</b> | -6.4858 | 0.8623  | 1.8288  |
| <b>H</b> | -7.7737 | 3.1456  | 1.6100  | <b>H</b> | -7.7572 | 3.0666  | 1.7854  |
| <b>H</b> | -7.2840 | 4.7810  | -0.2972 | <b>H</b> | -7.3005 | 4.7795  | -0.0612 |
| <b>H</b> | -5.5288 | 4.1736  | -2.0590 | <b>H</b> | -5.5691 | 4.2507  | -1.8714 |
| <b>H</b> | -4.2893 | 1.9566  | -1.9188 | <b>H</b> | -4.3205 | 2.0341  | -1.8389 |
| <b>H</b> | -4.3833 | -1.9075 | 1.9283  | <b>H</b> | -4.4039 | -1.9861 | 1.8546  |
| <b>H</b> | -5.7508 | -4.0482 | 2.0746  | <b>H</b> | -5.7721 | -4.1317 | 1.8956  |
| <b>H</b> | -7.5579 | -4.5430 | 0.3301  | <b>H</b> | -7.5566 | -4.5543 | 0.1094  |
| <b>H</b> | -7.9704 | -2.8735 | -1.5657 | <b>H</b> | -7.9461 | -2.8086 | -1.7216 |
| <b>H</b> | -6.5823 | -0.7464 | -1.7222 | <b>H</b> | -6.5567 | -0.6769 | -1.7735 |

### Ph2N-TTz-CHO in absorption state

| toluene |         |         | chloroform |   |         |         |         |
|---------|---------|---------|------------|---|---------|---------|---------|
| C       | -3.8513 | -0.0002 | -0.0139    | C | -3.8518 | 0.0007  | -0.0183 |
| C       | -3.0633 | 1.0319  | 0.6153     | C | -3.0635 | 1.0395  | 0.6005  |
| C       | -1.6425 | 0.9844  | 0.5856     | C | -1.6425 | 0.9927  | 0.5694  |
| C       | -0.9477 | -0.0997 | -0.0631    | C | -0.9472 | -0.0962 | -0.0711 |
| C       | -1.7360 | -1.1275 | -0.6885    | C | -1.7356 | -1.1305 | -0.6866 |
| C       | -3.1591 | -1.0800 | -0.6704    | C | -3.1587 | -1.0843 | -0.6665 |
| C       | 0.5546  | -0.1231 | -0.0692    | C | 0.5551  | -0.1194 | -0.0783 |
| N       | 1.3146  | 0.9374  | 0.1807     | N | 1.3163  | 0.9460  | 0.1482  |
| C       | 2.6518  | 0.5927  | 0.1206     | C | 2.6539  | 0.5989  | 0.0964  |
| C       | 2.9962  | -0.7355 | -0.1795    | C | 2.9966  | -0.7357 | -0.1747 |
| S       | 1.4912  | -1.6893 | -0.3946    | S | 1.4906  | -1.6925 | -0.3695 |
| S       | 4.1525  | 1.5455  | 0.3375     | S | 4.1557  | 1.5541  | 0.2957  |
| C       | 5.0897  | -0.0103 | 0.0021     | C | 5.0909  | -0.0093 | -0.0036 |
| N       | 4.3335  | -1.0717 | -0.2487    | N | 4.3342  | -1.0752 | -0.2338 |
| C       | 6.5979  | -0.0404 | -0.0091    | C | 6.5995  | -0.0396 | -0.0114 |
| C       | 7.3816  | 1.0088  | 0.5968     | C | 7.3801  | 0.9914  | 0.6292  |
| C       | 8.8028  | 0.9580  | 0.5705     | C | 8.8015  | 0.9406  | 0.6069  |
| C       | 9.4755  | -0.1462 | -0.0568    | C | 9.4765  | -0.1451 | -0.0504 |
| C       | 8.6986  | -1.1936 | -0.6558    | C | 8.7024  | -1.1744 | -0.6841 |
| C       | 7.2742  | -1.1460 | -0.6378    | C | 7.2778  | -1.1262 | -0.6705 |
| C       | 10.9954 | -0.2252 | -0.0943    | C | 10.9955 | -0.2260 | -0.0847 |
| O       | 11.7510 | 0.6091  | 0.3848     | O | 11.7516 | 0.5940  | 0.4219  |
| N       | -5.2865 | 0.0473  | 0.0147     | N | -5.2859 | 0.0462  | 0.0124  |
| C       | -6.0657 | -1.1784 | 0.1331     | C | -6.0645 | -1.1804 | 0.1322  |
| C       | -5.9881 | 1.3207  | -0.0832    | C | -5.9903 | 1.3192  | -0.0791 |
| C       | -5.8041 | -2.1029 | 1.1997     | C | -5.8087 | -2.0986 | 1.2057  |
| C       | -6.5717 | -3.3037 | 1.3150     | C | -6.5761 | -3.2997 | 1.3227  |
| C       | -7.6204 | -3.5866 | 0.3812     | C | -7.6186 | -3.5886 | 0.3832  |
| C       | -7.8888 | -2.6588 | -0.6756    | C | -7.8810 | -2.6668 | -0.6807 |
| C       | -7.1117 | -1.4647 | -0.8066    | C | -7.1038 | -1.4723 | -0.8129 |
| C       | -6.9845 | 1.6729  | 0.8874     | C | -6.9737 | 1.6728  | 0.9042  |
| C       | -7.6869 | 2.9145  | 0.7786     | C | -7.6791 | 2.9137  | 0.8015  |

|          |         |         |         |          |         |         |         |
|----------|---------|---------|---------|----------|---------|---------|---------|
| <b>C</b> | -7.3914 | 3.8241  | -0.2868 | <b>C</b> | -7.3992 | 3.8203  | -0.2711 |
| <b>C</b> | -6.3917 | 3.4752  | -1.2514 | <b>C</b> | -6.4123 | 3.4696  | -1.2486 |
| <b>C</b> | -5.6998 | 2.2273  | -1.1582 | <b>C</b> | -5.7176 | 2.2225  | -1.1609 |
| <b>H</b> | -3.5722 | 1.8780  | 1.1406  | <b>H</b> | -3.5713 | 1.8893  | 1.1206  |
| <b>H</b> | -1.0551 | 1.7885  | 1.0934  | <b>H</b> | -1.0568 | 1.8015  | 1.0717  |
| <b>H</b> | -1.2417 | -1.9709 | -1.2357 | <b>H</b> | -1.2420 | -1.9783 | -1.2273 |
| <b>H</b> | -3.7407 | -1.8874 | -1.1804 | <b>H</b> | -3.7392 | -1.8967 | -1.1694 |
| <b>H</b> | 6.8797  | 1.8671  | 1.1113  | <b>H</b> | 6.8762  | 1.8325  | 1.1689  |
| <b>H</b> | 9.4050  | 1.7724  | 1.0453  | <b>H</b> | 9.4001  | 1.7407  | 1.1094  |
| <b>H</b> | 9.2138  | -2.0586 | -1.1506 | <b>H</b> | 9.2192  | -2.0238 | -1.2031 |
| <b>H</b> | 6.6760  | -1.9605 | -1.1132 | <b>H</b> | 6.6825  | -1.9252 | -1.1751 |
| <b>H</b> | 11.4150 | -1.1535 | -0.6206 | <b>H</b> | 11.4158 | -1.1382 | -0.6349 |
| <b>H</b> | -4.9929 | -1.8800 | 1.9392  | <b>H</b> | -5.0033 | -1.8707 | 1.9499  |
| <b>H</b> | -6.3571 | -4.0168 | 2.1526  | <b>H</b> | -6.3665 | -4.0078 | 2.1657  |
| <b>H</b> | -8.2262 | -4.5240 | 0.4783  | <b>H</b> | -8.2240 | -4.5260 | 0.4815  |
| <b>H</b> | -8.7040 | -2.8694 | -1.4152 | <b>H</b> | -8.6909 | -2.8823 | -1.4247 |
| <b>H</b> | -7.3212 | -0.7451 | -1.6387 | <b>H</b> | -7.3079 | -0.7582 | -1.6511 |
| <b>H</b> | -7.2139 | 0.9680  | 1.7268  | <b>H</b> | -7.1902 | 0.9709  | 1.7495  |
| <b>H</b> | -8.4638 | 3.1767  | 1.5426  | <b>H</b> | -8.4455 | 3.1774  | 1.5754  |
| <b>H</b> | -7.9379 | 4.7988  | -0.3663 | <b>H</b> | -7.9479 | 4.7941  | -0.3461 |
| <b>H</b> | -6.1564 | 4.1741  | -2.0953 | <b>H</b> | -6.1897 | 4.1658  | -2.0981 |
| <b>H</b> | -4.9266 | 1.9541  | -1.9211 | <b>H</b> | -4.9556 | 1.9473  | -1.9343 |

**Ph2N-TTz-CHO in absorption state**

| <b>DCM</b> |         |         | <b>methanol</b> |   |         |         |         |
|------------|---------|---------|-----------------|---|---------|---------|---------|
| C          | -3.8520 | 0.0005  | -0.0175         | C | -3.8520 | -0.0004 | -0.0120 |
| C          | -3.0635 | 1.0427  | 0.5959          | C | -3.0630 | 1.0459  | 0.5947  |
| C          | -1.6425 | 0.9956  | 0.5654          | C | -1.6419 | 0.9981  | 0.5648  |
| C          | -0.9468 | -0.0965 | -0.0694         | C | -0.9460 | -0.0983 | -0.0626 |
| C          | -1.7351 | -1.1345 | -0.6792         | C | -1.7345 | -1.1408 | -0.6648 |
| C          | -3.1582 | -1.0883 | -0.6595         | C | -3.1577 | -1.0942 | -0.6456 |
| C          | 0.5555  | -0.1198 | -0.0768         | C | 0.5562  | -0.1216 | -0.0708 |
| N          | 1.3173  | 0.9490  | 0.1333          | N | 1.3186  | 0.9519  | 0.1133  |
| C          | 2.6552  | 0.6005  | 0.0872          | C | 2.6567  | 0.6019  | 0.0750  |
| C          | 2.9969  | -0.7381 | -0.1636         | C | 2.9974  | -0.7423 | -0.1442 |
| S          | 1.4904  | -1.6971 | -0.3438         | S | 1.4903  | -1.7048 | -0.3005 |
| S          | 4.1575  | 1.5579  | 0.2717          | S | 4.1595  | 1.5629  | 0.2353  |
| C          | 5.0918  | -0.0098 | -0.0040         | C | 5.0930  | -0.0108 | -0.0040 |
| N          | 4.3347  | -1.0790 | -0.2179         | N | 4.3354  | -1.0848 | -0.1916 |
| C          | 6.6005  | -0.0398 | -0.0124         | C | 6.6018  | -0.0403 | -0.0137 |
| C          | 7.3802  | 0.9900  | 0.6316          | C | 7.3810  | 0.9940  | 0.6236  |
| C          | 8.8017  | 0.9392  | 0.6096          | C | 8.8026  | 0.9433  | 0.6013  |
| C          | 9.4772  | -0.1446 | -0.0507         | C | 9.4782  | -0.1444 | -0.0528 |
| C          | 8.7039  | -1.1723 | -0.6884         | C | 8.7053  | -1.1763 | -0.6846 |
| C          | 7.2791  | -1.1240 | -0.6749         | C | 7.2803  | -1.1281 | -0.6705 |
| C          | 10.9957 | -0.2262 | -0.0851         | C | 10.9963 | -0.2268 | -0.0875 |
| O          | 11.7524 | 0.5924  | 0.4255          | O | 11.7536 | 0.5946  | 0.4199  |
| N          | -5.2854 | 0.0463  | 0.0125          | N | -5.2844 | 0.0468  | 0.0172  |
| C          | -6.0652 | -1.1803 | 0.1284          | C | -6.0672 | -1.1794 | 0.1222  |
| C          | -5.9901 | 1.3196  | -0.0763         | C | -5.9886 | 1.3210  | -0.0705 |
| C          | -5.8186 | -2.0959 | 1.2062          | C | -5.8366 | -2.0945 | 1.2039  |
| C          | -6.5876 | -3.2966 | 1.3198          | C | -6.6087 | -3.2943 | 1.3075  |
| C          | -7.6224 | -3.5873 | 0.3721          | C | -7.6307 | -3.5841 | 0.3452  |
| C          | -7.8757 | -2.6678 | -0.6964         | C | -7.8680 | -2.6648 | -0.7274 |
| C          | -7.0968 | -1.4738 | -0.8248         | C | -7.0857 | -1.4716 | -0.8452 |
| C          | -6.9656 | 1.6756  | 0.9138          | C | -6.9559 | 1.6806  | 0.9264  |
| C          | -7.6717 | 2.9166  | 0.8138          | C | -7.6623 | 2.9218  | 0.8279  |

|   |         |         |         |   |         |         |         |
|---|---------|---------|---------|---|---------|---------|---------|
| C | -7.4000 | 3.8205  | -0.2635 | C | -7.3986 | 3.8219  | -0.2548 |
| C | -6.4207 | 3.4671  | -1.2482 | C | -6.4274 | 3.4647  | -1.2464 |
| C | -5.7256 | 2.2200  | -1.1626 | C | -5.7321 | 2.2173  | -1.1620 |
| H | -3.5707 | 1.8950  | 1.1125  | H | -3.5694 | 1.9013  | 1.1066  |
| H | -1.0578 | 1.8068  | 1.0652  | H | -1.0581 | 1.8124  | 1.0608  |
| H | -1.2417 | -1.9852 | -1.2154 | H | -1.2413 | -1.9955 | -1.1948 |
| H | -3.7379 | -1.9034 | -1.1588 | H | -3.7366 | -1.9128 | -1.1400 |
| H | 6.8760  | 1.8293  | 1.1737  | H | 6.8768  | 1.8364  | 1.1607  |
| H | 9.3988  | 1.7385  | 1.1152  | H | 9.3986  | 1.7462  | 1.1023  |
| H | 9.2208  | -2.0195 | -1.2103 | H | 9.2220  | -2.0258 | -1.2024 |
| H | 6.6850  | -1.9213 | -1.1838 | H | 6.6871  | -1.9281 | -1.1761 |
| H | 11.4162 | -1.1355 | -0.6380 | H | 11.4167 | -1.1377 | -0.6361 |
| H | -5.0198 | -1.8663 | 1.9570  | H | -5.0484 | -1.8651 | 1.9659  |
| H | -6.3855 | -4.0027 | 2.1662  | H | -6.4195 | -4.0002 | 2.1570  |
| H | -8.2290 | -4.5242 | 0.4675  | H | -8.2398 | -4.5202 | 0.4326  |
| H | -8.6792 | -2.8849 | -1.4467 | H | -8.6610 | -2.8815 | -1.4889 |
| H | -7.2929 | -0.7621 | -1.6669 | H | -7.2684 | -0.7608 | -1.6910 |
| H | -7.1750 | 0.9763  | 1.7631  | H | -7.1580 | 0.9847  | 1.7803  |
| H | -8.4318 | 3.1825  | 1.5930  | H | -8.4157 | 3.1910  | 1.6125  |
| H | -7.9491 | 4.7942  | -0.3367 | H | -7.9477 | 4.7956  | -0.3270 |
| H | -6.2050 | 4.1610  | -2.1013 | H | -6.2185 | 4.1554  | -2.1037 |
| H | -4.9703 | 1.9424  | -1.9418 | H | -4.9840 | 1.9362  | -1.9467 |

### Ph2N-TTz-COOH in absorption state

| toluene |         |         | chloroform |   |         |         |         |
|---------|---------|---------|------------|---|---------|---------|---------|
| C       | 0.1992  | -0.0931 | -0.0684    | C | 0.2000  | -0.0971 | -0.0531 |
| N       | 0.9508  | 0.9610  | 0.2295     | N | 0.9529  | 0.9761  | 0.1644  |
| C       | 2.2913  | 0.6278  | 0.1602     | C | 2.2937  | 0.6374  | 0.1213  |
| C       | 2.6455  | -0.6838 | -0.1952    | C | 2.6462  | -0.6975 | -0.1336 |
| S       | 1.1476  | -1.6364 | -0.4608    | S | 1.1473  | -1.6669 | -0.3230 |
| S       | 3.7856  | 1.5821  | 0.4185     | S | 3.7891  | 1.6060  | 0.3114  |
| C       | 4.7342  | 0.0558  | -0.0119    | C | 4.7357  | 0.0449  | 0.0329  |
| N       | 3.9863  | -1.0034 | -0.2925    | N | 3.9873  | -1.0287 | -0.1863 |
| C       | 6.2434  | 0.0341  | -0.0048    | C | 6.2453  | 0.0264  | 0.0276  |
| C       | -1.3041 | -0.0814 | -0.0628    | C | -1.3033 | -0.0841 | -0.0525 |
| C       | 7.0185  | 1.2436  | -0.0753    | C | 7.0172  | 1.0570  | 0.6688  |
| C       | 8.4442  | 1.1948  | -0.0633    | C | 8.4432  | 1.0163  | 0.6461  |
| C       | 8.3529  | -1.2785 | 0.0772     | C | 8.3577  | -1.0946 | -0.6514 |
| C       | 6.9306  | -1.2319 | 0.0708     | C | 6.9351  | -1.0538 | -0.6343 |
| C       | -2.0834 | -1.0771 | -0.7489    | C | -2.0817 | -1.1269 | -0.6666 |
| C       | -3.5071 | -1.0410 | -0.7315    | C | -3.5055 | -1.0897 | -0.6544 |
| C       | -4.2084 | -0.0060 | -0.0149    | C | -4.2090 | -0.0056 | -0.0158 |
| C       | -3.4296 | 0.9934  | 0.6753     | C | -3.4307 | 1.0414  | 0.6021  |
| C       | -2.0079 | 0.9581  | 0.6463     | C | -2.0090 | 1.0037  | 0.5788  |
| N       | -5.6450 | 0.0296  | 0.0126     | N | -5.6442 | 0.0314  | 0.0067  |
| C       | -6.4151 | -1.2063 | 0.0684     | C | -6.4156 | -1.1995 | 0.1316  |
| C       | -6.3547 | 1.3019  | -0.0244    | C | -6.3558 | 1.2990  | -0.1044 |
| C       | -7.3596 | 1.5978  | 0.9566     | C | -7.3515 | 1.6558  | 0.8657  |
| C       | -8.0693 | 2.8393  | 0.9072     | C | -8.0640 | 2.8912  | 0.7439  |
| C       | -7.7729 | 3.8048  | -0.1080    | C | -7.7790 | 3.7897  | -0.3346 |
| C       | -6.7647 | 3.5119  | -1.0828    | C | -6.7798 | 3.4359  | -1.2989 |
| C       | -6.0655 | 2.2648  | -1.0495    | C | -6.0780 | 2.1940  | -1.1923 |
| C       | -6.1424 | -2.1850 | 1.0832     | C | -6.1603 | -2.1073 | 1.2144  |
| C       | -6.9005 | -3.3965 | 1.1364     | C | -6.9200 | -3.3131 | 1.3364  |
| C       | -7.9511 | -3.6371 | 0.1925     | C | -7.9546 | -3.6171 | 0.3926  |
| C       | -8.2308 | -2.6556 | -0.8119    | C | -8.2168 | -2.7056 | -0.6806 |
| C       | -7.4630 | -1.4501 | -0.8816    | C | -7.4471 | -1.5066 | -0.8177 |



|   |         |         |         |   |         |         |         |
|---|---------|---------|---------|---|---------|---------|---------|
| H | 6.5144  | 2.2398  | -0.1597 | H | 6.5112  | 1.8944  | 1.2128  |
| H | 9.0278  | 2.1455  | -0.1223 | H | 9.0235  | 1.8243  | 1.1540  |
| H | 8.8806  | -2.2623 | 0.1392  | H | 8.8856  | -1.9327 | -1.1700 |
| H | 6.3388  | -2.1776 | 0.1303  | H | 6.3466  | -1.8567 | -1.1415 |
| H | -1.5812 | -1.8837 | -1.3431 | H | -1.5794 | -1.9744 | -1.2003 |
| H | -4.0822 | -1.8216 | -1.2890 | H | -4.0783 | -1.9087 | -1.1562 |
| H | -3.9462 | 1.8038  | 1.2479  | H | -3.9471 | 1.8909  | 1.1151  |
| H | -1.4273 | 1.7357  | 1.2017  | H | -1.4309 | 1.8191  | 1.0801  |
| H | -7.5900 | 0.8491  | 1.7572  | H | -7.5722 | 0.9605  | 1.7157  |
| H | -8.8529 | 3.0571  | 1.6788  | H | -8.8401 | 3.1574  | 1.5076  |
| H | -8.3251 | 4.7793  | -0.1407 | H | -8.3333 | 4.7593  | -0.4245 |
| H | -6.5283 | 4.2549  | -1.8882 | H | -6.5530 | 4.1256  | -2.1529 |
| H | -5.2857 | 2.0361  | -1.8207 | H | -5.3063 | 1.9165  | -1.9555 |
| H | -5.3297 | -1.9961 | 1.8308  | H | -5.3608 | -1.8677 | 1.9619  |
| H | -6.6767 | -4.1520 | 1.9338  | H | -6.7106 | -4.0130 | 2.1866  |
| H | -8.5494 | -4.5833 | 0.2413  | H | -8.5542 | -4.5582 | 0.4947  |
| H | -9.0476 | -2.8325 | -1.5591 | H | -9.0206 | -2.9331 | -1.4281 |
| H | -7.6813 | -0.6886 | -1.6735 | H | -7.6509 | -0.8008 | -1.6633 |
| C | 9.1230  | -0.0673 | 0.0129  | C | 9.1250  | -0.0604 | -0.0143 |
| C | 10.6506 | -0.1713 | 0.0267  | C | 10.6532 | -0.1474 | -0.0631 |
| O | 11.2714 | -1.2225 | 0.0858  | O | 11.2763 | -1.0461 | -0.6120 |
| O | 11.2667 | 1.0435  | -0.0342 | O | 11.2649 | 0.8887  | 0.5733  |
| H | 12.2419 | 0.8897  | -0.0207 | H | 12.2418 | 0.7631  | 0.4985  |

### Ph2N-TTz-COOH in absorption state

| DCM |         |         | methanol |   |         |         |         |
|-----|---------|---------|----------|---|---------|---------|---------|
| C   | 0.2005  | -0.0984 | -0.0491  | C | 0.2015  | -0.1010 | -0.0410 |
| N   | 0.9540  | 0.9788  | 0.1471   | N | 0.9557  | 0.9823  | 0.1175  |
| C   | 2.2951  | 0.6385  | 0.1114   | C | 2.2970  | 0.6402  | 0.0941  |
| C   | 2.6465  | -0.7013 | -0.1169  | C | 2.6473  | -0.7069 | -0.0873 |
| S   | 1.1470  | -1.6735 | -0.2873  | S | 1.1470  | -1.6835 | -0.2236 |
| S   | 3.7910  | 1.6099  | 0.2819   | S | 3.7934  | 1.6164  | 0.2289  |
| C   | 4.7367  | 0.0438  | 0.0341   | C | 4.7380  | 0.0428  | 0.0354  |
| N   | 3.9878  | -1.0340 | -0.1635  | N | 3.9889  | -1.0415 | -0.1234 |
| C   | 6.2464  | 0.0256  | 0.0277   | C | 6.2479  | 0.0248  | 0.0274  |
| C   | -1.3027 | -0.0853 | -0.0487  | C | -1.3016 | -0.0880 | -0.0402 |
| C   | 7.0180  | 1.0592  | 0.6645   | C | 7.0195  | 1.0714  | 0.6427  |
| C   | 8.4442  | 1.0188  | 0.6410   | C | 8.4458  | 1.0310  | 0.6182  |
| C   | 8.3588  | -1.0974 | -0.6484  | C | 8.3600  | -1.1103 | -0.6296 |
| C   | 6.9361  | -1.0569 | -0.6306  | C | 6.9372  | -1.0700 | -0.6108 |
| C   | -2.0810 | -1.1325 | -0.6559  | C | -2.0797 | -1.1423 | -0.6355 |
| C   | -3.5048 | -1.0950 | -0.6449  | C | -3.5036 | -1.1041 | -0.6264 |
| C   | -4.2091 | -0.0060 | -0.0145  | C | -4.2089 | -0.0073 | -0.0096 |
| C   | -3.4307 | 1.0450  | 0.5971   | C | -3.4301 | 1.0502  | 0.5915  |
| C   | -2.0089 | 1.0067  | 0.5751   | C | -2.0083 | 1.0109  | 0.5711  |
| N   | -5.6435 | 0.0317  | 0.0065   | N | -5.6421 | 0.0322  | 0.0088  |
| C   | -6.4170 | -1.1991 | 0.1251   | C | -6.4195 | -1.1981 | 0.1130  |
| C   | -6.3551 | 1.3001  | -0.1009  | C | -6.3531 | 1.3021  | -0.0926 |
| C   | -7.3424 | 1.6591  | 0.8768   | C | -7.3291 | 1.6630  | 0.8957  |
| C   | -8.0553 | 2.8949  | 0.7588   | C | -8.0423 | 2.8995  | 0.7839  |
| C   | -7.7787 | 3.7911  | -0.3241  | C | -7.7769 | 3.7936  | -0.3037 |
| C   | -6.7876 | 3.4349  | -1.2963  | C | -6.7971 | 3.4351  | -1.2867 |
| C   | -6.0856 | 2.1926  | -1.1929  | C | -6.0949 | 2.1923  | -1.1890 |
| C   | -6.1735 | -2.1049 | 1.2122   | C | -6.1973 | -2.1041 | 1.2043  |
| C   | -6.9356 | -3.3100 | 1.3284   | C | -6.9640 | -3.3077 | 1.3070  |
| C   | -7.9607 | -3.6148 | 0.3741   | C | -7.9723 | -3.6104 | 0.3339  |
| C   | -8.2109 | -2.7049 | -0.7037  | C | -8.2012 | -2.7002 | -0.7486 |
| C   | -7.4386 | -1.5066 | -0.8346  | C | -7.4241 | -1.5032 | -0.8652 |

|   |         |         |         |   |         |         |         |
|---|---------|---------|---------|---|---------|---------|---------|
| H | 6.5123  | 1.8986  | 1.2054  | H | 6.5142  | 1.9212  | 1.1674  |
| H | 9.0237  | 1.8292  | 1.1456  | H | 9.0249  | 1.8518  | 1.1061  |
| H | 8.8856  | -1.9374 | -1.1649 | H | 8.8855  | -1.9601 | -1.1309 |
| H | 6.3484  | -1.8615 | -1.1360 | H | 6.3500  | -1.8842 | -1.1013 |
| H | -1.5788 | -1.9838 | -1.1835 | H | -1.5773 | -1.9996 | -1.1529 |
| H | -4.0767 | -1.9172 | -1.1423 | H | -4.0742 | -1.9316 | -1.1162 |
| H | -3.9465 | 1.8976  | 1.1052  | H | -3.9450 | 1.9081  | 1.0912  |
| H | -1.4320 | 1.8251  | 1.0730  | H | -1.4324 | 1.8343  | 1.0621  |
| H | -7.5557 | 0.9660  | 1.7306  | H | -7.5326 | 0.9718  | 1.7534  |
| H | -8.8247 | 3.1631  | 1.5285  | H | -8.8026 | 3.1698  | 1.5618  |
| H | -8.3331 | 4.7608  | -0.4114 | H | -8.3314 | 4.7638  | -0.3863 |
| H | -6.5679 | 4.1226  | -2.1537 | H | -6.5866 | 4.1212  | -2.1477 |
| H | -5.3211 | 1.9128  | -1.9625 | H | -5.3400 | 1.9100  | -1.9671 |
| H | -5.3823 | -1.8643 | 1.9679  | H | -5.4198 | -1.8645 | 1.9746  |
| H | -6.7359 | -4.0085 | 2.1820  | H | -6.7815 | -4.0066 | 2.1641  |
| H | -8.5620 | -4.5552 | 0.4715  | H | -8.5772 | -4.5495 | 0.4204  |
| H | -9.0068 | -2.9332 | -1.4593 | H | -8.9834 | -2.9270 | -1.5187 |
| H | -7.6324 | -0.8025 | -1.6840 | H | -7.6000 | -0.7993 | -1.7187 |
| C | 9.1261  | -0.0604 | -0.0155 | C | 9.1275  | -0.0607 | -0.0179 |
| C | 10.6544 | -0.1460 | -0.0648 | C | 10.6560 | -0.1455 | -0.0673 |
| O | 11.2775 | -1.0470 | -0.6120 | O | 11.2788 | -1.0568 | -0.5992 |
| O | 11.2652 | 0.8915  | 0.5674  | O | 11.2662 | 0.9029  | 0.5443  |
| H | 12.2427 | 0.7691  | 0.4939  | H | 12.2443 | 0.7824  | 0.4730  |

We show XYZ coordinates of asymmetric TTz dyes for emission cases. These coordinates are obtained based on the dielectric DFT method of Eq. (2) with the 6-31+G\* basis set.

### Bu<sub>2</sub>N-TTz-Py in emission

| toluene |         |         |         | chloroform |         |         |         |
|---------|---------|---------|---------|------------|---------|---------|---------|
| C       | -3.2332 | -0.7783 | -0.1413 | C          | -3.2312 | -0.7802 | -0.1378 |
| C       | -2.8478 | 0.6196  | -0.0045 | C          | -2.8459 | 0.6209  | -0.0230 |
| S       | -4.3393 | 1.6145  | 0.1661  | S          | -4.3388 | 1.6167  | 0.1418  |
| C       | -5.3056 | 0.0121  | 0.0499  | C          | -5.3056 | 0.0131  | 0.0463  |
| N       | -4.5364 | -1.1023 | -0.1123 | N          | -4.5322 | -1.1046 | -0.1010 |
| S       | -1.7533 | -1.7701 | -0.3224 | S          | -1.7493 | -1.7725 | -0.3087 |
| C       | -0.7738 | -0.1742 | -0.2155 | C          | -0.7695 | -0.1754 | -0.2185 |
| N       | -1.5492 | 0.9378  | -0.0457 | N          | -1.5494 | 0.9394  | -0.0666 |
| C       | -6.7663 | -0.0080 | 0.1145  | C          | -6.7628 | -0.0090 | 0.1173  |
| C       | 0.6764  | -0.1542 | -0.2673 | C          | 0.6781  | -0.1529 | -0.2778 |
| C       | -7.4993 | -1.2625 | 0.0200  | C          | -7.4972 | -1.2663 | 0.0425  |
| C       | -8.9167 | -1.2373 | 0.0881  | C          | -8.9137 | -1.2425 | 0.1158  |
| N       | -9.6711 | -0.1031 | 0.2381  | N          | -9.6707 | -0.1069 | 0.2541  |
| C       | -8.9862 | 1.0749  | 0.3239  | C          | -8.9854 | 1.0739  | 0.3230  |
| C       | -7.5693 | 1.1923  | 0.2702  | C          | -7.5696 | 1.1924  | 0.2626  |
| C       | 1.4055  | 1.1092  | -0.1449 | C          | 1.4075  | 1.1137  | -0.1753 |
| C       | 2.8078  | 1.1628  | -0.2137 | C          | 2.8091  | 1.1681  | -0.2451 |
| C       | 3.6217  | -0.0445 | -0.4125 | C          | 3.6254  | -0.0424 | -0.4260 |
| C       | 2.8899  | -1.3108 | -0.4969 | C          | 2.8924  | -1.3115 | -0.4977 |
| C       | 1.4829  | -1.3592 | -0.4297 | C          | 1.4867  | -1.3596 | -0.4303 |
| N       | 5.0087  | 0.0136  | -0.4969 | N          | 5.0087  | 0.0138  | -0.5103 |
| C       | 5.7282  | 1.3173  | -0.6964 | C          | 5.7339  | 1.3191  | -0.6917 |
| C       | 5.8433  | -1.2346 | -0.5288 | C          | 5.8436  | -1.2368 | -0.5367 |
| C       | 6.2820  | 1.9672  | 0.6346  | C          | 6.2602  | 1.9640  | 0.6530  |
| C       | 7.0440  | 3.3319  | 0.3967  | C          | 7.0278  | 3.3290  | 0.4347  |
| C       | 6.1197  | 4.5474  | -0.0014 | C          | 6.1131  | 4.5476  | 0.0241  |
| C       | 5.9917  | -1.9555 | 0.8734  | C          | 5.9937  | -1.9497 | 0.8696  |
| C       | 6.7180  | -3.3558 | 0.7831  | C          | 6.7175  | -3.3516 | 0.7836  |

|          |         |         |         |          |         |         |         |
|----------|---------|---------|---------|----------|---------|---------|---------|
| <b>C</b> | 8.2340  | -3.2913 | 0.3505  | <b>C</b> | 8.2331  | -3.2911 | 0.3488  |
| <b>H</b> | -6.9572 | -2.2301 | -0.1024 | <b>H</b> | -6.9567 | -2.2360 | -0.0697 |
| <b>H</b> | -9.4912 | -2.1959 | 0.0178  | <b>H</b> | -9.4857 | -2.2034 | 0.0600  |
| <b>H</b> | -9.6121 | 1.9956  | 0.4444  | <b>H</b> | -9.6109 | 1.9959  | 0.4347  |
| <b>H</b> | -7.1060 | 2.2073  | 0.3498  | <b>H</b> | -7.1089 | 2.2094  | 0.3281  |
| <b>H</b> | 0.8295  | 2.0515  | 0.0134  | <b>H</b> | 0.8327  | 2.0588  | -0.0299 |
| <b>H</b> | 3.2944  | 2.1556  | -0.0805 | <b>H</b> | 3.2934  | 2.1635  | -0.1282 |
| <b>H</b> | 3.4328  | -2.2742 | -0.6233 | <b>H</b> | 3.4353  | -2.2757 | -0.6151 |
| <b>H</b> | 0.9893  | -2.3592 | -0.5151 | <b>H</b> | 0.9946  | -2.3610 | -0.5051 |
| <b>H</b> | 6.5945  | 1.1144  | -1.3949 | <b>H</b> | 6.6136  | 1.1151  | -1.3712 |
| <b>H</b> | 5.0473  | 2.0244  | -1.2459 | <b>H</b> | 5.0651  | 2.0274  | -1.2541 |
| <b>H</b> | 5.4231  | -1.9551 | -1.2975 | <b>H</b> | 5.4197  | -1.9595 | -1.2998 |
| <b>H</b> | 6.8574  | -0.9316 | -0.9089 | <b>H</b> | 6.8562  | -0.9359 | -0.9209 |
| <b>H</b> | 5.4278  | 2.1260  | 1.3656  | <b>H</b> | 5.3919  | 2.1219  | 1.3672  |
| <b>H</b> | 6.9899  | 1.2311  | 1.1262  | <b>H</b> | 6.9588  | 1.2268  | 1.1550  |
| <b>H</b> | 7.5985  | 3.5945  | 1.3504  | <b>H</b> | 7.5635  | 3.5865  | 1.4004  |
| <b>H</b> | 7.8433  | 3.1841  | -0.3991 | <b>H</b> | 7.8419  | 3.1831  | -0.3461 |
| <b>H</b> | 5.3215  | 4.7258  | 0.7857  | <b>H</b> | 5.2986  | 4.7217  | 0.7953  |
| <b>H</b> | 6.7275  | 5.4995  | -0.0919 | <b>H</b> | 6.7241  | 5.4994  | -0.0481 |
| <b>H</b> | 5.5976  | 4.3901  | -0.9949 | <b>H</b> | 5.6117  | 4.3957  | -0.9808 |
| <b>H</b> | 6.5633  | -1.2743 | 1.5783  | <b>H</b> | 6.5680  | -1.2668 | 1.5701  |
| <b>H</b> | 4.9677  | -2.1012 | 1.3326  | <b>H</b> | 4.9704  | -2.0929 | 1.3312  |
| <b>H</b> | 6.6487  | -3.8506 | 1.8012  | <b>H</b> | 6.6491  | -3.8416 | 1.8041  |
| <b>H</b> | 6.1481  | -4.0309 | 0.0667  | <b>H</b> | 6.1453  | -4.0280 | 0.0704  |
| <b>H</b> | 8.8256  | -2.6088 | 1.0388  | <b>H</b> | 8.8261  | -2.6069 | 1.0341  |
| <b>H</b> | 8.7085  | -4.3191 | 0.3986  | <b>H</b> | 8.7054  | -4.3198 | 0.4000  |
| <b>H</b> | 8.3660  | -2.9121 | -0.7094 | <b>H</b> | 8.3638  | -2.9153 | -0.7125 |

**Bu<sub>2</sub>N-TTz-Py in emission state**

| <b>DCM</b> |         |         | <b>methanol</b> |          |         |         |         |
|------------|---------|---------|-----------------|----------|---------|---------|---------|
| <b>C</b>   | -3.2329 | -0.7792 | -0.1332         | <b>C</b> | -3.2341 | -0.7794 | -0.1266 |
| <b>C</b>   | -2.8474 | 0.6231  | -0.0220         | <b>C</b> | -2.8484 | 0.6243  | -0.0209 |
| <b>S</b>   | -4.3413 | 1.6190  | 0.1401          | <b>S</b> | -4.3431 | 1.6208  | 0.1360  |
| <b>C</b>   | -5.3086 | 0.0156  | 0.0461          | <b>C</b> | -5.3111 | 0.0175  | 0.0460  |
| <b>N</b>   | -4.5328 | -1.1033 | -0.0971         | <b>N</b> | -4.5330 | -1.1029 | -0.0912 |
| <b>S</b>   | -1.7501 | -1.7713 | -0.3001         | <b>S</b> | -1.7504 | -1.7718 | -0.2877 |
| <b>C</b>   | -0.7697 | -0.1742 | -0.2110         | <b>C</b> | -0.7695 | -0.1743 | -0.2032 |
| <b>N</b>   | -1.5523 | 0.9417  | -0.0637         | <b>N</b> | -1.5545 | 0.9429  | -0.0619 |
| <b>C</b>   | -6.7641 | -0.0076 | 0.1153          | <b>C</b> | -6.7650 | -0.0066 | 0.1127  |
| <b>C</b>   | 0.6762  | -0.1506 | -0.2723         | <b>C</b> | 0.6747  | -0.1497 | -0.2659 |
| <b>C</b>   | -7.4994 | -1.2658 | 0.0410          | <b>C</b> | -7.5011 | -1.2658 | 0.0410  |
| <b>C</b>   | -8.9157 | -1.2429 | 0.1120          | <b>C</b> | -8.9172 | -1.2436 | 0.1093  |
| <b>N</b>   | -9.6744 | -0.1072 | 0.2478          | <b>N</b> | -9.6776 | -0.1076 | 0.2404  |
| <b>C</b>   | -8.9888 | 1.0746  | 0.3168          | <b>C</b> | -8.9918 | 1.0754  | 0.3072  |
| <b>C</b>   | -7.5735 | 1.1937  | 0.2585          | <b>C</b> | -7.5767 | 1.1949  | 0.2511  |
| <b>C</b>   | 1.4065  | 1.1171  | -0.1748         | <b>C</b> | 1.4053  | 1.1195  | -0.1756 |
| <b>C</b>   | 2.8073  | 1.1716  | -0.2468         | <b>C</b> | 2.8055  | 1.1746  | -0.2497 |
| <b>C</b>   | 3.6242  | -0.0401 | -0.4251         | <b>C</b> | 3.6234  | -0.0385 | -0.4235 |
| <b>C</b>   | 2.8902  | -1.3105 | -0.4926         | <b>C</b> | 2.8889  | -1.3106 | -0.4838 |
| <b>C</b>   | 1.4855  | -1.3583 | -0.4236         | <b>C</b> | 1.4851  | -1.3583 | -0.4130 |
| <b>N</b>   | 5.0051  | 0.0150  | -0.5125         | <b>N</b> | 5.0018  | 0.0161  | -0.5146 |
| <b>C</b>   | 5.7332  | 1.3205  | -0.6898         | <b>C</b> | 5.7320  | 1.3224  | -0.6872 |
| <b>C</b>   | 5.8401  | -1.2370 | -0.5410         | <b>C</b> | 5.8376  | -1.2370 | -0.5464 |
| <b>C</b>   | 6.2613  | 1.9580  | 0.6576          | <b>C</b> | 6.2572  | 1.9548  | 0.6635  |
| <b>C</b>   | 7.0435  | 3.3151  | 0.4433          | <b>C</b> | 7.0515  | 3.3056  | 0.4539  |
| <b>C</b>   | 6.1453  | 4.5404  | 0.0169          | <b>C</b> | 6.1682  | 4.5354  | 0.0102  |
| <b>C</b>   | 5.9929  | -1.9493 | 0.8652          | <b>C</b> | 5.9964  | -1.9478 | 0.8599  |
| <b>C</b>   | 6.7144  | -3.3523 | 0.7773          | <b>C</b> | 6.7163  | -3.3514 | 0.7694  |
| <b>C</b>   | 8.2285  | -3.2938 | 0.3371          | <b>C</b> | 8.2274  | -3.2945 | 0.3190  |
| <b>H</b>   | -6.9596 | -2.2361 | -0.0695         | <b>H</b> | -6.9621 | -2.2370 | -0.0658 |
| <b>H</b>   | -9.4862 | -2.2047 | 0.0562          | <b>H</b> | -9.4864 | -2.2063 | 0.0550  |
| <b>H</b>   | -9.6143 | 1.9968  | 0.4268          | <b>H</b> | -9.6172 | 1.9979  | 0.4136  |

|   |         |         |         |   |         |         |         |
|---|---------|---------|---------|---|---------|---------|---------|
| H | -7.1142 | 2.2112  | 0.3241  | H | -7.1189 | 2.2131  | 0.3146  |
| H | 0.8328  | 2.0632  | -0.0314 | H | 0.8325  | 2.0666  | -0.0360 |
| H | 3.2914  | 2.1676  | -0.1340 | H | 3.2886  | 2.1714  | -0.1430 |
| H | 3.4327  | -2.2749 | -0.6087 | H | 3.4313  | -2.2753 | -0.5960 |
| H | 0.9937  | -2.3599 | -0.4954 | H | 0.9941  | -2.3605 | -0.4795 |
| H | 6.6114  | 1.1161  | -1.3703 | H | 6.6110  | 1.1176  | -1.3658 |
| H | 5.0654  | 2.0321  | -1.2486 | H | 5.0663  | 2.0359  | -1.2457 |
| H | 5.4132  | -1.9586 | -1.3029 | H | 5.4067  | -1.9578 | -1.3060 |
| H | 6.8513  | -0.9361 | -0.9277 | H | 6.8465  | -0.9354 | -0.9375 |
| H | 5.3922  | 2.1242  | 1.3690  | H | 5.3855  | 2.1282  | 1.3699  |
| H | 6.9516  | 1.2140  | 1.1607  | H | 6.9394  | 1.2058  | 1.1697  |
| H | 7.5695  | 3.5709  | 1.4149  | H | 7.5658  | 3.5612  | 1.4318  |
| H | 7.8654  | 3.1584  | -0.3269 | H | 7.8823  | 3.1394  | -0.3045 |
| H | 5.3191  | 4.7210  | 0.7741  | H | 5.3289  | 4.7212  | 0.7517  |
| H | 6.7653  | 5.4873  | -0.0454 | H | 6.7950  | 5.4786  | -0.0417 |
| H | 5.6600  | 4.3913  | -0.9961 | H | 5.7007  | 4.3874  | -1.0113 |
| H | 6.5707  | -1.2675 | 1.5638  | H | 6.5789  | -1.2663 | 1.5545  |
| H | 4.9708  | -2.0916 | 1.3299  | H | 4.9766  | -2.0895 | 1.3298  |
| H | 6.6492  | -3.8410 | 1.7987  | H | 6.6578  | -3.8375 | 1.7926  |
| H | 6.1385  | -4.0280 | 0.0667  | H | 6.1348  | -4.0279 | 0.0642  |
| H | 8.8243  | -2.6092 | 1.0195  | H | 8.8275  | -2.6073 | 0.9949  |
| H | 8.6997  | -4.3232 | 0.3879  | H | 8.6986  | -4.3241 | 0.3703  |
| H | 8.3555  | -2.9192 | -0.7250 | H | 8.3469  | -2.9235 | -0.7451 |

### Ph2N-TTz-Py in emission case

| toluene |         |         |         | chloroform |         |         |         |
|---------|---------|---------|---------|------------|---------|---------|---------|
| C       | 1.1939  | -0.1222 | -0.0817 | C          | 1.1938  | -0.1223 | -0.0843 |
| N       | 1.9773  | 0.8486  | 0.4833  | N          | 1.9806  | 0.8645  | 0.4548  |
| C       | 3.2762  | 0.5681  | 0.3256  | C          | 3.2774  | 0.5793  | 0.3059  |
| C       | 3.6559  | -0.6466 | -0.3773 | C          | 3.6582  | -0.6562 | -0.3634 |
| S       | 2.1694  | -1.5112 | -0.8842 | S          | 2.1708  | -1.5336 | -0.8472 |
| S       | 4.7763  | 1.4269  | 0.8339  | S          | 4.7781  | 1.4514  | 0.7918  |
| C       | 5.7372  | 0.0358  | 0.0301  | C          | 5.7403  | 0.0383  | 0.0286  |
| N       | 4.9632  | -0.9279 | -0.5323 | N          | 4.9637  | -0.9417 | -0.5089 |
| C       | 7.2061  | 0.0139  | 0.0234  | C          | 7.2065  | 0.0141  | 0.0244  |
| C       | -0.2562 | -0.1022 | -0.0731 | C          | -0.2537 | -0.1011 | -0.0759 |
| C       | 8.0156  | 1.0510  | 0.6341  | C          | 8.0181  | 1.0670  | 0.6086  |
| C       | 9.4350  | 0.9453  | 0.5785  | C          | 9.4368  | 0.9585  | 0.5586  |
| N       | 10.1130 | -0.0787 | -0.0182 | N          | 10.1160 | -0.0827 | -0.0095 |
| C       | 9.3508  | -1.0598 | -0.5956 | C          | 9.3527  | -1.0789 | -0.5621 |
| C       | 7.9299  | -1.0760 | -0.6113 | C          | 7.9324  | -1.0937 | -0.5798 |
| C       | -1.0649 | -1.1562 | -0.6894 | C          | -1.0641 | -1.1703 | -0.6664 |
| C       | -2.4754 | -1.1095 | -0.6615 | C          | -2.4734 | -1.1242 | -0.6375 |
| C       | -3.1728 | -0.0100 | -0.0196 | C          | -3.1729 | -0.0089 | -0.0212 |
| C       | -2.3813 | 1.0458  | 0.5963  | C          | -2.3795 | 1.0633  | 0.5668  |
| C       | -0.9741 | 1.0037  | 0.5742  | C          | -0.9732 | 1.0208  | 0.5444  |
| N       | -4.5957 | 0.0329  | 0.0124  | N          | -4.5916 | 0.0330  | 0.0116  |
| C       | -5.3629 | -1.1880 | 0.1848  | C          | -5.3615 | -1.1891 | 0.1782  |
| C       | -5.2963 | 1.2964  | -0.1317 | C          | -5.2964 | 1.2972  | -0.1246 |
| C       | -6.3618 | 1.6392  | 0.7715  | C          | -6.3451 | 1.6413  | 0.7964  |
| C       | -7.0504 | 2.8804  | 0.6207  | C          | -7.0389 | 2.8811  | 0.6522  |
| C       | -6.6833 | 3.7936  | -0.4211 | C          | -6.6926 | 3.7892  | -0.4013 |
| C       | -5.6192 | 3.4520  | -1.3172 | C          | -5.6453 | 3.4446  | -1.3164 |
| C       | -4.9281 | 2.2101  | -1.1797 | C          | -4.9496 | 2.2042  | -1.1850 |
| C       | -5.0124 | -2.1187 | 1.2239  | C          | -5.0269 | -2.1127 | 1.2281  |
| C       | -5.7698 | -3.3175 | 1.3910  | C          | -5.7873 | -3.3106 | 1.3909  |
| C       | -6.8827 | -3.5985 | 0.5335  | C          | -6.8872 | -3.5959 | 0.5177  |
| C       | -7.2315 | -2.6685 | -0.4994 | C          | -7.2205 | -2.6715 | -0.5256 |



|          |         |         |         |          |         |         |         |
|----------|---------|---------|---------|----------|---------|---------|---------|
| <b>C</b> | -6.4768 | -1.4700 | -0.6796 | <b>C</b> | -6.4624 | -1.4738 | -0.7009 |
| <b>H</b> | 7.5575  | 1.9334  | 1.1487  | <b>H</b> | 7.5613  | 1.9637  | 1.0988  |
| <b>H</b> | 10.0675 | 1.7424  | 1.0479  | <b>H</b> | 10.0682 | 1.7679  | 1.0079  |
| <b>H</b> | 9.9197  | -1.8940 | -1.0817 | <b>H</b> | 9.9204  | -1.9270 | -1.0248 |
| <b>H</b> | 7.3804  | -1.9136 | -1.1048 | <b>H</b> | 7.3851  | -1.9449 | -1.0519 |
| <b>H</b> | -0.5714 | -2.0124 | -1.2144 | <b>H</b> | -0.5718 | -2.0381 | -1.1729 |
| <b>H</b> | -3.0618 | -1.9222 | -1.1569 | <b>H</b> | -3.0586 | -1.9485 | -1.1140 |
| <b>H</b> | -2.8980 | 1.8921  | 1.1130  | <b>H</b> | -2.8946 | 1.9218  | 1.0640  |
| <b>H</b> | -0.3866 | 1.8117  | 1.0724  | <b>H</b> | -0.3876 | 1.8416  | 1.0235  |
| <b>H</b> | -6.6439 | 0.9338  | 1.5929  | <b>H</b> | -6.6107 | 0.9395  | 1.6263  |
| <b>H</b> | -7.8747 | 3.1421  | 1.3323  | <b>H</b> | -7.8506 | 3.1449  | 1.3772  |
| <b>H</b> | -7.2249 | 4.7671  | -0.5338 | <b>H</b> | -7.2381 | 4.7610  | -0.5093 |
| <b>H</b> | -5.3311 | 4.1535  | -2.1414 | <b>H</b> | -5.3748 | 4.1415  | -2.1501 |
| <b>H</b> | -4.1080 | 1.9389  | -1.8910 | <b>H</b> | -4.1440 | 1.9294  | -1.9114 |
| <b>H</b> | -4.1540 | -1.8936 | 1.9055  | <b>H</b> | -4.1799 | -1.8831 | 1.9225  |
| <b>H</b> | -5.4953 | -4.0321 | 2.2085  | <b>H</b> | -5.5260 | -4.0202 | 2.2169  |
| <b>H</b> | -7.4762 | -4.5380 | 0.6698  | <b>H</b> | -7.4832 | -4.5343 | 0.6505  |
| <b>H</b> | -8.0940 | -2.8832 | -1.1809 | <b>H</b> | -8.0732 | -2.8893 | -1.2180 |
| <b>H</b> | -6.7457 | -0.7510 | -1.4937 | <b>H</b> | -6.7191 | -0.7591 | -1.5226 |

**Ph2N-TTz-Py in emission case**

| <b>DCM</b> |         |         | <b>methanol</b> |   |         |         |         |
|------------|---------|---------|-----------------|---|---------|---------|---------|
| C          | 1.1938  | -0.1231 | -0.0840         | C | 1.1937  | -0.1257 | -0.0810 |
| N          | 1.9827  | 0.8745  | 0.4363          | N | 1.9845  | 0.8812  | 0.4226  |
| C          | 3.2782  | 0.5862  | 0.2934          | C | 3.2788  | 0.5909  | 0.2843  |
| C          | 3.6594  | -0.6634 | -0.3517         | C | 3.6605  | -0.6707 | -0.3396 |
| S          | 2.1715  | -1.5496 | -0.8187         | S | 2.1722  | -1.5649 | -0.7906 |
| S          | 4.7792  | 1.4680  | 0.7619          | S | 4.7801  | 1.4813  | 0.7369  |
| C          | 5.7421  | 0.0396  | 0.0278          | C | 5.7437  | 0.0405  | 0.0277  |
| N          | 4.9637  | -0.9516 | -0.4909         | N | 4.9637  | -0.9607 | -0.4740 |
| C          | 7.2065  | 0.0143  | 0.0245          | C | 7.2064  | 0.0147  | 0.0238  |
| C          | -0.2522 | -0.1012 | -0.0755         | C | -0.2508 | -0.1029 | -0.0726 |
| C          | 8.0198  | 1.0793  | 0.5864          | C | 8.0215  | 1.0901  | 0.5656  |
| C          | 9.4382  | 0.9690  | 0.5392          | C | 9.4395  | 0.9790  | 0.5193  |
| N          | 10.1177 | -0.0851 | -0.0062         | N | 10.1193 | -0.0855 | -0.0076 |
| C          | 9.3534  | -1.0929 | -0.5380         | C | 9.3539  | -1.1032 | -0.5203 |
| C          | 7.9333  | -1.1071 | -0.5557         | C | 7.9341  | -1.1175 | -0.5366 |
| C          | -1.0636 | -1.1794 | -0.6498         | C | -1.0632 | -1.1888 | -0.6326 |
| C          | -2.4721 | -1.1335 | -0.6209         | C | -2.4710 | -1.1425 | -0.6042 |
| C          | -3.1728 | -0.0085 | -0.0208         | C | -3.1727 | -0.0089 | -0.0192 |
| C          | -2.3784 | 1.0730  | 0.5505          | C | -2.3772 | 1.0805  | 0.5377  |
| C          | -0.9726 | 1.0303  | 0.5280          | C | -0.9719 | 1.0370  | 0.5159  |
| N          | -4.5890 | 0.0333  | 0.0115          | N | -4.5865 | 0.0337  | 0.0116  |
| C          | -5.3612 | -1.1895 | 0.1727          | C | -5.3617 | -1.1891 | 0.1672  |
| C          | -5.2958 | 1.2982  | -0.1198         | C | -5.2942 | 1.2997  | -0.1160 |
| C          | -6.3349 | 1.6427  | 0.8113          | C | -6.3233 | 1.6466  | 0.8247  |
| C          | -7.0313 | 2.8819  | 0.6716          | C | -7.0213 | 2.8856  | 0.6882  |
| C          | -6.6967 | 3.7877  | -0.3879         | C | -6.6977 | 3.7877  | -0.3780 |
| C          | -5.6590 | 3.4416  | -1.3136         | C | -5.6700 | 3.4382  | -1.3138 |
| C          | -4.9610 | 2.2018  | -1.1863         | C | -4.9707 | 2.1986  | -1.1894 |
| C          | -5.0390 | -2.1086 | 1.2299          | C | -5.0529 | -2.1041 | 1.2314  |
| C          | -5.8017 | -3.3059 | 1.3883          | C | -5.8188 | -3.3003 | 1.3849  |
| C          | -6.8913 | -3.5938 | 0.5029          | C | -6.8980 | -3.5900 | 0.4873  |
| C          | -7.2124 | -2.6729 | -0.5474         | C | -7.2058 | -2.6723 | -0.5700 |

|          |         |         |         |          |         |         |         |
|----------|---------|---------|---------|----------|---------|---------|---------|
| <b>C</b> | -6.4518 | -1.4758 | -0.7180 | <b>C</b> | -6.4418 | -1.4763 | -0.7354 |
| <b>H</b> | 7.5643  | 1.9868  | 1.0571  | <b>H</b> | 7.5672  | 2.0062  | 1.0203  |
| <b>H</b> | 10.0692 | 1.7878  | 0.9715  | <b>H</b> | 10.0702 | 1.8058  | 0.9361  |
| <b>H</b> | 9.9201  | -1.9513 | -0.9823 | <b>H</b> | 9.9196  | -1.9701 | -0.9494 |
| <b>H</b> | 7.3871  | -1.9686 | -1.0100 | <b>H</b> | 7.3888  | -1.9880 | -0.9746 |
| <b>H</b> | -0.5720 | -2.0541 | -1.1449 | <b>H</b> | -0.5723 | -2.0696 | -1.1173 |
| <b>H</b> | -3.0566 | -1.9644 | -1.0861 | <b>H</b> | -3.0548 | -1.9791 | -1.0597 |
| <b>H</b> | -2.8926 | 1.9383  | 1.0362  | <b>H</b> | -2.8905 | 1.9518  | 1.0132  |
| <b>H</b> | -0.3881 | 1.8585  | 0.9955  | <b>H</b> | -0.3884 | 1.8716  | 0.9731  |
| <b>H</b> | -6.5913 | 0.9426  | 1.6456  | <b>H</b> | -6.5706 | 0.9495  | 1.6642  |
| <b>H</b> | -7.8357 | 3.1468  | 1.4042  | <b>H</b> | -7.8179 | 3.1531  | 1.4283  |
| <b>H</b> | -7.2441 | 4.7587  | -0.4926 | <b>H</b> | -7.2462 | 4.7583  | -0.4804 |
| <b>H</b> | -5.3984 | 4.1363  | -2.1523 | <b>H</b> | -5.4186 | 4.1296  | -2.1580 |
| <b>H</b> | -4.1638 | 1.9251  | -1.9213 | <b>H</b> | -4.1824 | 1.9185  | -1.9326 |
| <b>H</b> | -4.2006 | -1.8763 | 1.9338  | <b>H</b> | -4.2233 | -1.8697 | 1.9449  |
| <b>H</b> | -5.5506 | -4.0124 | 2.2200  | <b>H</b> | -5.5785 | -4.0040 | 2.2221  |
| <b>H</b> | -7.4893 | -4.5314 | 0.6322  | <b>H</b> | -7.4985 | -4.5265 | 0.6127  |
| <b>H</b> | -8.0572 | -2.8928 | -1.2488 | <b>H</b> | -8.0425 | -2.8937 | -1.2805 |
| <b>H</b> | -6.6984 | -0.7639 | -1.5452 | <b>H</b> | -6.6774 | -0.7671 | -1.5681 |

**Ph2N-TTz-CHO in emission states**

| <b>toluene</b> |         |         | <b>chloroform</b> |   |         |         |         |
|----------------|---------|---------|-------------------|---|---------|---------|---------|
| C              | -3.8402 | -0.0043 | -0.0200           | C | -3.8396 | -0.0044 | -0.0147 |
| C              | -3.0394 | 1.0711  | 0.5469            | C | -3.0374 | 1.0856  | 0.5255  |
| C              | -1.6315 | 1.0211  | 0.5155            | C | -1.6303 | 1.0334  | 0.4981  |
| C              | -0.9246 | -0.1105 | -0.0901           | C | -0.9217 | -0.1144 | -0.0769 |
| C              | -1.7391 | -1.1818 | -0.6581           | C | -1.7372 | -1.2004 | -0.6177 |
| C              | -3.1500 | -1.1300 | -0.6235           | C | -3.1469 | -1.1475 | -0.5867 |
| C              | 0.5311  | -0.1380 | -0.1050           | C | 0.5314  | -0.1436 | -0.0907 |
| N              | 1.3175  | 0.8503  | 0.4084            | N | 1.3213  | 0.8614  | 0.3915  |
| C              | 2.6183  | 0.5593  | 0.2633            | C | 2.6199  | 0.5657  | 0.2548  |
| C              | 2.9902  | -0.6892 | -0.3797           | C | 2.9919  | -0.7044 | -0.3495 |
| S              | 1.4970  | -1.5666 | -0.8393           | S | 1.4975  | -1.5952 | -0.7797 |
| S              | 4.1203  | 1.4366  | 0.7272            | S | 4.1225  | 1.4577  | 0.6883  |
| C              | 5.0787  | -0.0022 | -0.0095           | C | 5.0818  | -0.0034 | -0.0032 |
| N              | 4.2927  | -0.9905 | -0.5253           | N | 4.2922  | -1.0093 | -0.4870 |
| C              | 6.5391  | -0.0346 | -0.0139           | C | 6.5388  | -0.0364 | -0.0104 |
| C              | 7.3429  | 1.0462  | 0.5537            | C | 7.3459  | 1.0630  | 0.5205  |
| C              | 8.7556  | 0.9867  | 0.5392            | C | 8.7579  | 1.0038  | 0.5020  |
| C              | 9.4422  | -0.1489 | -0.0397           | C | 9.4453  | -0.1493 | -0.0443 |
| C              | 8.6545  | -1.2221 | -0.6051           | C | 8.6548  | -1.2416 | -0.5721 |
| C              | 7.2396  | -1.1782 | -0.5987           | C | 7.2406  | -1.1986 | -0.5614 |
| C              | 10.9459 | -0.2265 | -0.0593           | C | 10.9455 | -0.2277 | -0.0700 |
| O              | 11.7100 | 0.6272  | 0.3942            | O | 11.7151 | 0.6412  | 0.3528  |
| N              | -5.2602 | 0.0445  | 0.0204            | N | -5.2555 | 0.0464  | 0.0194  |
| C              | -6.0367 | -1.1735 | 0.1953            | C | -6.0384 | -1.1718 | 0.1808  |
| C              | -5.9615 | 1.3119  | -0.1165           | C | -5.9581 | 1.3159  | -0.1115 |
| C              | -5.7124 | -2.0884 | 1.2556            | C | -5.7426 | -2.0793 | 1.2547  |
| C              | -6.4796 | -3.2810 | 1.4268            | C | -6.5165 | -3.2697 | 1.4140  |
| C              | -7.5776 | -3.5687 | 0.5524            | C | -7.5925 | -3.5604 | 0.5133  |
| C              | -7.9019 | -2.6525 | -0.5003           | C | -7.8885 | -2.6500 | -0.5531 |
| C              | -7.1358 | -1.4608 | -0.6844           | C | -7.1152 | -1.4605 | -0.7247 |
| C              | -6.9943 | 1.6687  | 0.8167            | C | -6.9781 | 1.6742  | 0.8341  |
| C              | -7.6869 | 2.9094  | 0.6713            | C | -7.6735 | 2.9145  | 0.6937  |

|   |         |         |         |   |         |         |         |
|---|---------|---------|---------|---|---------|---------|---------|
| C | -7.3542 | 3.8062  | -0.3956 | C | -7.3554 | 3.8073  | -0.3814 |
| C | -6.3225 | 3.4491  | -1.3233 | C | -6.3366 | 3.4470  | -1.3223 |
| C | -5.6295 | 2.2071  | -1.1910 | C | -5.6413 | 2.2054  | -1.1945 |
| H | -3.5469 | 1.9406  | 1.0331  | H | -3.5436 | 1.9675  | 0.9893  |
| H | -1.0378 | 1.8464  | 0.9773  | H | -1.0389 | 1.8707  | 0.9407  |
| H | -1.2528 | -2.0601 | -1.1531 | H | -1.2518 | -2.0914 | -1.0901 |
| H | -3.7409 | -1.9601 | -1.0831 | H | -3.7359 | -1.9889 | -1.0269 |
| H | 6.8459  | 1.9401  | 1.0102  | H | 6.8509  | 1.9705  | 0.9512  |
| H | 9.3576  | 1.8217  | 0.9776  | H | 9.3583  | 1.8541  | 0.9123  |
| H | 9.1731  | -2.1085 | -1.0581 | H | 9.1719  | -2.1416 | -0.9987 |
| H | 6.6459  | -2.0153 | -1.0392 | H | 6.6480  | -2.0508 | -0.9732 |
| H | 11.3700 | -1.1759 | -0.5456 | H | 11.3674 | -1.1905 | -0.5280 |
| H | -4.8652 | -1.8573 | 1.9498  | H | -4.9133 | -1.8450 | 1.9692  |
| H | -6.2248 | -3.9846 | 2.2603  | H | -6.2848 | -3.9684 | 2.2582  |
| H | -8.1794 | -4.5027 | 0.6919  | H | -8.1998 | -4.4922 | 0.6434  |
| H | -8.7540 | -2.8716 | -1.1935 | H | -8.7236 | -2.8715 | -1.2659 |
| H | -7.3866 | -0.7509 | -1.5126 | H | -7.3433 | -0.7551 | -1.5631 |
| H | -7.2503 | 0.9742  | 1.6562  | H | -7.2227 | 0.9825  | 1.6793  |
| H | -8.4870 | 3.1826  | 1.4061  | H | -8.4641 | 3.1898  | 1.4378  |
| H | -7.8981 | 4.7790  | -0.5044 | H | -7.9014 | 4.7793  | -0.4867 |
| H | -6.0621 | 4.1377  | -2.1675 | H | -6.0888 | 4.1319  | -2.1732 |
| H | -4.8344 | 1.9231  | -1.9261 | H | -4.8576 | 1.9179  | -1.9403 |

**Ph2N-TTz-CHO in emission states**

| <b>DCM</b> |         |         | <b>methanol</b> |   |         |         |         |
|------------|---------|---------|-----------------|---|---------|---------|---------|
| C          | -3.8390 | -0.0049 | -0.0129         | C | -3.8384 | -0.0063 | -0.0111 |
| C          | -3.0359 | 1.0930  | 0.5121          | C | -3.0338 | 1.0990  | 0.4984  |
| C          | -1.6293 | 1.0395  | 0.4868          | C | -1.6279 | 1.0435  | 0.4756  |
| C          | -0.9200 | -0.1170 | -0.0713         | C | -0.9182 | -0.1221 | -0.0646 |
| C          | -1.7363 | -1.2106 | -0.5974         | C | -1.7357 | -1.2229 | -0.5754 |
| C          | -3.1453 | -1.1571 | -0.5679         | C | -3.1440 | -1.1681 | -0.5481 |
| C          | 0.5316  | -0.1473 | -0.0843         | C | 0.5317  | -0.1539 | -0.0761 |
| N          | 1.3232  | 0.8658  | 0.3826          | N | 1.3248  | 0.8677  | 0.3748  |
| C          | 2.6205  | 0.5684  | 0.2499          | C | 2.6209  | 0.5688  | 0.2464  |
| C          | 2.9930  | -0.7120 | -0.3357         | C | 2.9941  | -0.7219 | -0.3192 |
| S          | 1.4981  | -1.6091 | -0.7515         | S | 1.4991  | -1.6260 | -0.7194 |
| S          | 4.1232  | 1.4673  | 0.6691          | S | 4.1232  | 1.4754  | 0.6503  |
| C          | 5.0834  | -0.0036 | -0.0006         | C | 5.0848  | -0.0051 | 0.0032  |
| N          | 4.2920  | -1.0180 | -0.4691         | N | 4.2920  | -1.0286 | -0.4487 |
| C          | 6.5383  | -0.0370 | -0.0088         | C | 6.5377  | -0.0380 | -0.0069 |
| C          | 7.3471  | 1.0707  | 0.5056          | C | 7.3477  | 1.0784  | 0.4902  |
| C          | 8.7586  | 1.0116  | 0.4855          | C | 8.7587  | 1.0203  | 0.4675  |
| C          | 9.4469  | -0.1492 | -0.0459         | C | 9.4485  | -0.1475 | -0.0490 |
| C          | 8.6552  | -1.2499 | -0.5566         | C | 8.6559  | -1.2570 | -0.5417 |
| C          | 7.2415  | -1.2074 | -0.5442         | C | 7.2426  | -1.2160 | -0.5266 |
| C          | 10.9451 | -0.2281 | -0.0743         | C | 10.9447 | -0.2258 | -0.0810 |
| O          | 11.7176 | 0.6477  | 0.3345          | O | 11.7195 | 0.6578  | 0.3120  |
| N          | -5.2525 | 0.0471  | 0.0188          | N | -5.2493 | 0.0479  | 0.0175  |
| C          | -6.0392 | -1.1708 | 0.1739          | C | -6.0412 | -1.1689 | 0.1659  |
| C          | -5.9558 | 1.3178  | -0.1088         | C | -5.9520 | 1.3206  | -0.1068 |
| C          | -5.7595 | -2.0731 | 1.2560          | C | -5.7800 | -2.0658 | 1.2565  |
| C          | -6.5376 | -3.2618 | 1.4101          | C | -6.5638 | -3.2518 | 1.4049  |
| C          | -7.6014 | -3.5548 | 0.4955          | C | -7.6145 | -3.5463 | 0.4756  |
| C          | -7.8812 | -2.6488 | -0.5792         | C | -7.8759 | -2.6447 | -0.6076 |
| C          | -7.1035 | -1.4610 | -0.7452         | C | -7.0924 | -1.4596 | -0.7674 |
| C          | -6.9647 | 1.6795  | 0.8468          | C | -6.9466 | 1.6884  | 0.8609  |
| C          | -7.6617 | 2.9195  | 0.7090          | C | -7.6439 | 2.9290  | 0.7257  |

|   |         |         |         |   |         |         |         |
|---|---------|---------|---------|---|---------|---------|---------|
| C | -7.3558 | 3.8073  | -0.3739 | C | -7.3518 | 3.8098  | -0.3667 |
| C | -6.3479 | 3.4428  | -1.3252 | C | -6.3578 | 3.4385  | -1.3301 |
| C | -5.6512 | 2.2015  | -1.1995 | C | -5.6610 | 2.1968  | -1.2068 |
| H | -3.5413 | 1.9814  | 0.9637  | H | -3.5381 | 1.9944  | 0.9370  |
| H | -1.0390 | 1.8832  | 0.9184  | H | -1.0383 | 1.8935  | 0.8958  |
| H | -1.2515 | -2.1081 | -1.0576 | H | -1.2517 | -2.1271 | -1.0229 |
| H | -3.7334 | -2.0043 | -0.9974 | H | -3.7315 | -2.0208 | -0.9668 |
| H | 6.8529  | 1.9840  | 0.9245  | H | 6.8540  | 1.9971  | 0.8974  |
| H | 9.3577  | 1.8688  | 0.8833  | H | 9.3562  | 1.8847  | 0.8521  |
| H | 9.1717  | -2.1557 | -0.9710 | H | 9.1722  | -2.1683 | -0.9441 |
| H | 6.6498  | -2.0664 | -0.9429 | H | 6.6522  | -2.0820 | -0.9117 |
| H | 11.3662 | -1.1964 | -0.5191 | H | 11.3655 | -1.1997 | -0.5119 |
| H | -4.9404 | -1.8364 | 1.9812  | H | -4.9716 | -1.8272 | 1.9931  |
| H | -6.3190 | -3.9568 | 2.2607  | H | -6.3599 | -3.9431 | 2.2621  |
| H | -8.2121 | -4.4849 | 0.6215  | H | -8.2296 | -4.4741 | 0.5969  |
| H | -8.7067 | -2.8722 | -1.3024 | H | -8.6911 | -2.8694 | -1.3420 |
| H | -7.3183 | -0.7591 | -1.5900 | H | -7.2921 | -0.7613 | -1.6190 |
| H | -7.1994 | 0.9916  | 1.6980  | H | -7.1694 | 1.0060  | 1.7195  |
| H | -8.4438 | 3.1983  | 1.4607  | H | -8.4150 | 3.2133  | 1.4866  |
| H | -7.9030 | 4.7788  | -0.4775 | H | -7.8992 | 4.7814  | -0.4684 |
| H | -6.1102 | 4.1236  | -2.1822 | H | -6.1313 | 4.1138  | -2.1945 |
| H | -4.8768 | 1.9099  | -1.9535 | H | -4.8982 | 1.8990  | -1.9700 |

**Ph2N-TTz-COOH in emission states**

| <b>toluene</b> |         |         | <b>chloroform</b> |   |         |         |         |
|----------------|---------|---------|-------------------|---|---------|---------|---------|
| C              | 0.1757  | -0.1129 | -0.0872           | C | 0.1754  | -0.1159 | -0.0822 |
| N              | 0.9554  | 0.8804  | 0.4353            | N | 0.9586  | 0.8930  | 0.4120  |
| C              | 2.2570  | 0.5987  | 0.2914            | C | 2.2581  | 0.6067  | 0.2765  |
| C              | 2.6405  | -0.6448 | -0.3594           | C | 2.6421  | -0.6570 | -0.3383 |
| S              | 1.1547  | -1.5321 | -0.8286           | S | 1.1552  | -1.5566 | -0.7817 |
| S              | 3.7525  | 1.4829  | 0.7655            | S | 3.7543  | 1.5047  | 0.7236  |
| C              | 4.7229  | 0.0560  | 0.0217            | C | 4.7257  | 0.0567  | 0.0228  |
| N              | 3.9455  | -0.9336 | -0.5024           | N | 3.9453  | -0.9494 | -0.4726 |
| C              | 6.1854  | 0.0357  | 0.0199            | C | 6.1854  | 0.0354  | 0.0205  |
| C              | -1.2777 | -0.0961 | -0.0779           | C | -1.2754 | -0.0977 | -0.0732 |
| C              | 6.9793  | 1.1114  | 0.6015            | C | 6.9821  | 1.1290  | 0.5680  |
| C              | 8.3972  | 1.0612  | 0.5861            | C | 8.3994  | 1.0781  | 0.5522  |
| C              | 8.3113  | -1.1311 | -0.5884           | C | 8.3125  | -1.1497 | -0.5542 |
| C              | 6.8970  | -1.0933 | -0.5791           | C | 6.8986  | -1.1122 | -0.5445 |
| C              | -2.0834 | -1.1746 | -0.6495           | C | -2.0825 | -1.1894 | -0.6203 |
| C              | -3.4948 | -1.1323 | -0.6204           | C | -3.4928 | -1.1467 | -0.5926 |
| C              | -4.1956 | -0.0111 | -0.0204           | C | -4.1958 | -0.0108 | -0.0188 |
| C              | -3.4051 | 1.0707  | 0.5498            | C | -3.4037 | 1.0845  | 0.5265  |
| C              | -1.9968 | 1.0315  | 0.5251            | C | -1.9962 | 1.0441  | 0.5034  |
| N              | -5.6174 | 0.0278  | 0.0139            | N | -5.6137 | 0.0288  | 0.0128  |
| C              | -6.3848 | -1.1939 | 0.2011            | C | -6.3854 | -1.1938 | 0.1900  |
| C              | -6.3262 | 1.2885  | -0.1433           | C | -6.3248 | 1.2911  | -0.1362 |
| C              | -7.3699 | 1.6493  | 0.7769            | C | -7.3548 | 1.6522  | 0.7983  |
| C              | -8.0694 | 2.8838  | 0.6115            | C | -8.0576 | 2.8864  | 0.6403  |
| C              | -7.7328 | 3.7715  | -0.4623           | C | -7.7372 | 3.7713  | -0.4410 |
| C              | -6.6898 | 3.4111  | -1.3763           | C | -6.7079 | 3.4091  | -1.3701 |
| C              | -5.9898 | 2.1749  | -1.2242           | C | -6.0049 | 2.1734  | -1.2249 |
| C              | -6.0520 | -2.0973 | 1.2691            | C | -6.0732 | -2.0915 | 1.2682  |
| C              | -6.8100 | -3.2943 | 1.4522            | C | -6.8357 | -3.2875 | 1.4426  |
| C              | -7.9074 | -3.5984 | 0.5821            | C | -7.9167 | -3.5943 | 0.5528  |
| C              | -8.2398 | -2.6941 | -0.4788           | C | -8.2288 | -2.6943 | -0.5182 |
| C              | -7.4828 | -1.4983 | -0.6750           | C | -7.4670 | -1.4995 | -0.7051 |



|   |         |         |         |   |         |         |         |
|---|---------|---------|---------|---|---------|---------|---------|
| H | 6.4798  | 1.9965  | 1.0719  | H | 6.4842  | 2.0285  | 1.0121  |
| H | 8.9796  | 1.8998  | 1.0403  | H | 8.9807  | 1.9312  | 0.9800  |
| H | 8.8424  | -2.0003 | -1.0504 | H | 8.8408  | -2.0339 | -0.9904 |
| H | 6.3106  | -1.9293 | -1.0320 | H | 6.3138  | -1.9629 | -0.9712 |
| H | -1.5886 | -2.0499 | -1.1418 | H | -1.5887 | -2.0754 | -1.0940 |
| H | -4.0785 | -1.9673 | -1.0814 | H | -4.0750 | -1.9917 | -1.0361 |
| H | -3.9219 | 1.9371  | 1.0327  | H | -3.9191 | 1.9615  | 0.9907  |
| H | -1.4110 | 1.8615  | 0.9890  | H | -1.4124 | 1.8851  | 0.9498  |
| H | -7.6290 | 0.9625  | 1.6222  | H | -7.6011 | 0.9673  | 1.6488  |
| H | -8.8781 | 3.1597  | 1.3363  | H | -8.8560 | 3.1635  | 1.3758  |
| H | -8.2822 | 4.7397  | -0.5867 | H | -8.2891 | 4.7388  | -0.5599 |
| H | -6.4257 | 4.0924  | -2.2257 | H | -6.4575 | 4.0878  | -2.2257 |
| H | -5.1858 | 1.8883  | -1.9488 | H | -5.2129 | 1.8844  | -1.9617 |
| H | -5.2051 | -1.8538 | 1.9598  | H | -5.2401 | -1.8450 | 1.9744  |
| H | -6.5485 | -3.9887 | 2.2917  | H | -6.5910 | -3.9780 | 2.2902  |
| H | -8.5021 | -4.5359 | 0.7310  | H | -8.5151 | -4.5306 | 0.6947  |
| H | -9.0912 | -2.9262 | -1.1692 | H | -9.0675 | -2.9285 | -1.2231 |
| H | -7.7399 | -0.7981 | -1.5099 | H | -7.7077 | -0.8028 | -1.5476 |
| C | 9.0888  | -0.0585 | -0.0074 | C | 9.0921  | -0.0594 | -0.0078 |
| C | 10.6017 | -0.1519 | -0.0433 | C | 10.6037 | -0.1519 | -0.0425 |
| O | 11.2371 | -1.0823 | -0.5311 | O | 11.2399 | -1.0975 | -0.5045 |
| O | 11.2236 | 0.9240  | 0.5333  | O | 11.2255 | 0.9391  | 0.5007  |
| H | 12.1967 | 0.7757  | 0.4635  | H | 12.1997 | 0.7935  | 0.4362  |

**Ph2N-TTz-COOH in emission states**

| <b>DCM</b> |         |         | <b>methanol</b> |   |         |         |         |
|------------|---------|---------|-----------------|---|---------|---------|---------|
| C          | 0.1752  | -0.1191 | -0.0749         | C | 0.1749  | -0.1224 | -0.0703 |
| N          | 0.9604  | 0.8968  | 0.4062          | N | 0.9618  | 0.9010  | 0.3968  |
| C          | 2.2586  | 0.6088  | 0.2741          | C | 2.2588  | 0.6115  | 0.2685  |
| C          | 2.6429  | -0.6639 | -0.3246         | C | 2.6436  | -0.6706 | -0.3126 |
| S          | 1.1554  | -1.5692 | -0.7552         | S | 1.1559  | -1.5819 | -0.7302 |
| S          | 3.7552  | 1.5130  | 0.7085          | S | 3.7556  | 1.5222  | 0.6896  |
| C          | 4.7272  | 0.0565  | 0.0260          | C | 4.7284  | 0.0568  | 0.0275  |
| N          | 3.9449  | -0.9573 | -0.4560         | N | 3.9447  | -0.9649 | -0.4402 |
| C          | 6.1851  | 0.0349  | 0.0220          | C | 6.1847  | 0.0349  | 0.0228  |
| C          | -1.2742 | -0.0998 | -0.0668         | C | -1.2730 | -0.1020 | -0.0629 |
| C          | 6.9838  | 1.1356  | 0.5552          | C | 6.9851  | 1.1436  | 0.5393  |
| C          | 8.4008  | 1.0848  | 0.5370          | C | 8.4018  | 1.0927  | 0.5200  |
| C          | 8.3128  | -1.1565 | -0.5424         | C | 8.3132  | -1.1645 | -0.5262 |
| C          | 6.8991  | -1.1196 | -0.5305         | C | 6.8997  | -1.1281 | -0.5132 |
| C          | -2.0820 | -1.1979 | -0.6015         | C | -2.0817 | -1.2063 | -0.5853 |
| C          | -3.4917 | -1.1547 | -0.5754         | C | -3.4907 | -1.1625 | -0.5603 |
| C          | -4.1957 | -0.0107 | -0.0164         | C | -4.1956 | -0.0111 | -0.0152 |
| C          | -3.4029 | 1.0912  | 0.5164          | C | -3.4018 | 1.0972  | 0.5050  |
| C          | -1.9958 | 1.0496  | 0.4955          | C | -1.9952 | 1.0545  | 0.4854  |
| N          | -5.6114 | 0.0299  | 0.0123          | N | -5.6091 | 0.0304  | 0.0116  |
| C          | -6.3861 | -1.1929 | 0.1833          | C | -6.3869 | -1.1924 | 0.1770  |
| C          | -6.3232 | 1.2931  | -0.1343         | C | -6.3215 | 1.2948  | -0.1313 |
| C          | -7.3468 | 1.6556  | 0.8063          | C | -7.3352 | 1.6601  | 0.8185  |
| C          | -8.0511 | 2.8895  | 0.6501          | C | -8.0406 | 2.8941  | 0.6654  |
| C          | -7.7382 | 3.7717  | -0.4358         | C | -7.7381 | 3.7724  | -0.4267 |
| C          | -6.7154 | 3.4072  | -1.3715         | C | -6.7250 | 3.4045  | -1.3718 |
| C          | -6.0112 | 2.1718  | -1.2278         | C | -6.0198 | 2.1690  | -1.2308 |
| C          | -6.0887 | -2.0856 | 1.2695          | C | -6.1035 | -2.0805 | 1.2703  |
| C          | -6.8543 | -3.2805 | 1.4387          | C | -6.8723 | -3.2743 | 1.4347  |
| C          | -7.9234 | -3.5904 | 0.5355          | C | -7.9304 | -3.5865 | 0.5192  |
| C          | -8.2206 | -2.6946 | -0.5435         | C | -8.2138 | -2.6945 | -0.5667 |
| C          | -7.4556 | -1.5008 | -0.7250         | C | -7.4453 | -1.5017 | -0.7431 |

|   |         |         |         |   |         |         |         |
|---|---------|---------|---------|---|---------|---------|---------|
| H | 6.4872  | 2.0402  | 0.9899  | H | 6.4894  | 2.0545  | 0.9615  |
| H | 8.9817  | 1.9437  | 0.9538  | H | 8.9821  | 1.9584  | 0.9234  |
| H | 8.8393  | -2.0463 | -0.9692 | H | 8.8382  | -2.0612 | -0.9405 |
| H | 6.3152  | -1.9764 | -0.9460 | H | 6.3167  | -1.9919 | -0.9155 |
| H | -1.5888 | -2.0896 | -1.0649 | H | -1.5891 | -2.1031 | -1.0392 |
| H | -4.0730 | -2.0044 | -1.0103 | H | -4.0713 | -2.0167 | -0.9868 |
| H | -3.9176 | 1.9737  | 0.9703  | H | -3.9157 | 1.9849  | 0.9491  |
| H | -1.4133 | 1.8960  | 0.9331  | H | -1.4137 | 1.9062  | 0.9141  |
| H | -7.5871 | 0.9729  | 1.6604  | H | -7.5667 | 0.9805  | 1.6774  |
| H | -8.8445 | 3.1683  | 1.3902  | H | -8.8265 | 3.1757  | 1.4124  |
| H | -8.2911 | 4.7386  | -0.5536 | H | -8.2919 | 4.7391  | -0.5423 |
| H | -6.4715 | 4.0833  | -2.2309 | H | -6.4898 | 4.0774  | -2.2360 |
| H | -5.2252 | 1.8804  | -1.9700 | H | -5.2422 | 1.8742  | -1.9805 |
| H | -5.2655 | -1.8360 | 1.9862  | H | -5.2895 | -1.8284 | 1.9965  |
| H | -6.6216 | -3.9674 | 2.2926  | H | -6.6509 | -3.9580 | 2.2941  |
| H | -8.5242 | -4.5256 | 0.6733  | H | -8.5337 | -4.5206 | 0.6532  |
| H | -9.0500 | -2.9313 | -1.2585 | H | -9.0346 | -2.9331 | -1.2909 |
| H | -7.6841 | -0.8076 | -1.5737 | H | -7.6623 | -0.8116 | -1.5974 |
| C | 9.0940  | -0.0592 | -0.0110 | C | 9.0956  | -0.0591 | -0.0122 |
| C | 10.6046 | -0.1504 | -0.0479 | C | 10.6054 | -0.1495 | -0.0498 |
| O | 11.2410 | -1.1015 | -0.5015 | O | 11.2420 | -1.1077 | -0.4913 |
| O | 11.2269 | 0.9462  | 0.4812  | O | 11.2279 | 0.9538  | 0.4623  |
| H | 12.2017 | 0.8029  | 0.4172  | H | 12.2032 | 0.8122  | 0.3999  |
